# Supplementary material for: Acceptability of a perturbation-based balance training programme for falls prevention in older adults: a qualitative study
Source: PubMed Central journal article supplement — BMJ Open. 2022 Feb 24;12(2):e056623. doi: 10.1136/bmjopen-2021-056623 (PMC8883254; doi:10.1136/bmjopen-2021-056623), 2022-02-24
Supplement: bmjopen-2021-056623.draft_revisions.pdf [file bmjopen-2021-056623.draft_revisions.pdf]

# BMJ Open

BMJ Open is committed to open peer review. As part of this commitment we make the peer review history of every article we publish publicly available.

When an article is published we post the peer reviewers' comments and the authors' responses online. We also post the versions of the paper that were used during peer review. These are the versions that the peer review comments apply to.

The versions of the paper that follow are the versions that were submitted during the peer review process. They are not the versions of record or the final published versions. They should not be cited or distributed as the published version of this manuscript.

BMJ Open is an open access journal and the full, final, typeset and author-corrected version of record of the manuscript is available on our site with no access controls, subscription charges or pay-per-view fees (<http://bmjopen.bmj.com>).

If you have any questions on BMJ Open's open peer review process please email [info.bmjopen@bmj.com](mailto:info.bmjopen@bmj.com)

# BMJ Open

## Acceptability of a perturbation-based balance training program for falls prevention in older adults: a qualitative study

|                               |                                                                                                                                                                                                                                                                                                                                                                                                                                                                                                                                                                                                                  |
|-------------------------------|------------------------------------------------------------------------------------------------------------------------------------------------------------------------------------------------------------------------------------------------------------------------------------------------------------------------------------------------------------------------------------------------------------------------------------------------------------------------------------------------------------------------------------------------------------------------------------------------------------------|
| Journal:                      | <i>BMJ Open</i>                                                                                                                                                                                                                                                                                                                                                                                                                                                                                                                                                                                                  |
| Manuscript ID                 | bmjopen-2021-056623                                                                                                                                                                                                                                                                                                                                                                                                                                                                                                                                                                                              |
| Article Type:                 | Original research                                                                                                                                                                                                                                                                                                                                                                                                                                                                                                                                                                                                |
| Date Submitted by the Author: | 20-Sep-2021                                                                                                                                                                                                                                                                                                                                                                                                                                                                                                                                                                                                      |
| Complete List of Authors:     | Gerards, Marissa; Maastricht University Medical Centre+, Physical Therapy; Maastricht University, Department of Epidemiology<br>Sieben, Judith; Maastricht University, Department of Epidemiology;<br>Maastricht University, Department of Anatomy and Embryology<br>Marcellis, Rik; Maastricht University Medical Centre+, Department of Physical Therapy<br>de Bie, Rob; Maastricht University, Department of Epidemiology<br>Meijer, Kenneth; Maastricht University, Department of Nutrition and Movement Sciences<br>Lenssen, Antoine; Maastricht University Medical Centre+, Department of Physical Therapy |
| Keywords:                     | GERIATRIC MEDICINE, PREVENTIVE MEDICINE, QUALITATIVE RESEARCH, REHABILITATION MEDICINE                                                                                                                                                                                                                                                                                                                                                                                                                                                                                                                           |
|                               |                                                                                                                                                                                                                                                                                                                                                                                                                                                                                                                                                                                                                  |

SCHOLARONE™  
Manuscripts

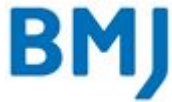

I, the Submitting Author has the right to grant and does grant on behalf of all authors of the Work (as defined in the below author licence), an exclusive licence and/or a non-exclusive licence for contributions from authors who are: i) UK Crown employees; ii) where BMJ has agreed a CC-BY licence shall apply, and/or iii) in accordance with the terms applicable for US Federal Government officers or employees acting as part of their official duties; on a worldwide, perpetual, irrevocable, royalty-free basis to BMJ Publishing Group Ltd ("BMJ") its licensees and where the relevant Journal is co-owned by BMJ to the co-owners of the Journal, to publish the Work in this journal and any other BMJ products and to exploit all rights, as set out in our [licence](#).

The Submitting Author accepts and understands that any supply made under these terms is made by BMJ to the Submitting Author unless you are acting as an employee on behalf of your employer or a postgraduate student of an affiliated institution which is paying any applicable article publishing charge ("APC") for Open Access articles. Where the Submitting Author wishes to make the Work available on an Open Access basis (and intends to pay the relevant APC), the terms of reuse of such Open Access shall be governed by a Creative Commons licence – details of these licences and which [Creative Commons](#) licence will apply to this Work are set out in our licence referred to above.

Other than as permitted in any relevant BMJ Author's Self Archiving Policies, I confirm this Work has not been accepted for publication elsewhere, is not being considered for publication elsewhere and does not duplicate material already published. I confirm all authors consent to publication of this Work and authorise the granting of this licence.

# Acceptability of a perturbation-based balance training program for falls prevention in older adults: a qualitative study

Marissa Gerards<sup>1,2\*</sup>, Judith Sieben<sup>2,3</sup>, Rik Marcellis<sup>1</sup>, Rob de Bie<sup>2</sup>, Kenneth Meijer<sup>4</sup>, Antoine Lenssen<sup>1</sup>

1. Department of Physical Therapy, Maastricht University Medical Center, Maastricht, The Netherlands

2. Department of Epidemiology, Care and Public Health Institute (CAPHRI), Maastricht University, Maastricht, The Netherlands

3. Department of Anatomy and Embryology, Maastricht University, Maastricht, The Netherlands

4. Department of Nutrition and Movement Sciences, School of Nutrition and Translational Research in Metabolism (NUTRIM), Maastricht University, Maastricht, The Netherlands

**Key words:** Balance, perturbation, falls prevention, older adults, accidental falls

\*Corresponding Author.

E-mail: [marissa.gerards@maastrichtuniversity.nl](mailto:marissa.gerards@maastrichtuniversity.nl)

**Word count: 4998**

## ABSTRACT

### Introduction

Perturbation-based balance training (PBT) is reported to effectively reduce daily-life falls in older adults, and may even be superior compared to various exercise programs. Due to the nature of the intervention, requiring unpredictable balance perturbations, the question arises whether acceptability is an issue in PBT. The aim of this study is to evaluate the acceptability of PBT in older adults with a recent history of falls.

### Methods

Semi-structured interviews were conducted in older adults who completed a three-session PBT protocol as part of another study. Typical case and purposive sampling strategies were applied. Interviews were based on the theoretical framework of acceptability (TFA) alongside context-specific factors and analysed using a template analysis approach.

### Results

Sixteen participants were interviewed. The results indicate that this PBT protocol is perceived as acceptable by older adults with a recent history of falls, and highlight key areas for potential future modifications. Enjoyment of the novel training and technology, being able to feel safe during training and perceived impact of increased self-efficacy and balance confidence were identified as facilitating factors. Potential issues included initial apprehension or anxiety during training and perceived impact being predominantly psychological instead of physical. Complimentary to the TFA one additional theme emerged, which described challenges regarding the training setting such as preference for group training in some participants and travel to the training location.

### Conclusions

The results suggest that PBT is perceived acceptable by older adults with a history of falls, and indicate important factors that should be considered in future implementation of PBT.

## STRENGTHS AND LIMITATIONS OF THIS STUDY

- This is the first study to use the theoretical framework of acceptability (TFA) to explore older adults' perceived acceptability of PBT.
- Using the TFA enabled a systematic approach to define and assess intervention acceptability.
- Triangulation was applied in data collection as well as data analysis to increase trustworthiness of the research findings.
- The PBT intervention was applied in a research setting, meaning that some specific factors, such as willingness to pay for participation in the intervention, were not evaluated.
- The results only reflect the perceived retrospective acceptability of the PBT, and may not entirely reflect how participant's views changed over time.

## INTRODUCTION

Falls in community-dwelling older adults can be effectively reduced through exercise interventions including balance training,[1]. However, the search for the optimal balance training program for falls prevention is still ongoing. With conventional balance training, a relatively high number of training sessions are needed, discontinuation rates are high and retention of training effects is hard to accomplish,[2, 3]. Moreover, conventional balance training seems not sufficiently task-specific to prevent falls due to slips or trips during walking, which cause up to 60% of falls in community-dwelling older adults,[4, 5]. It is not likely that conventional balance training, mostly targeting volitional movements, will improve the change-in-support reactions (e.g. taking a quick step) needed to prevent a slip or a trip, due to the additional speed and stability requirements of these balance reactions,[6]. Therefore, an increasing interest has arisen in more task-specific balance training interventions, such as perturbation-based balance training (PBT).

PBT aims to improve rapid balance reactions after unexpected external perturbations. During PBT, participants are repeatedly exposed to destabilizing perturbations while performing activities of daily living in a safe and controlled environment. A systematic review by Mansfield et al. indicated that PBT may be more effective in reducing daily-life falls in older adults, compared to various interventions ranging from no exercise to individualized physical therapy (risk ratio 0.71, 95% CI=0.52,0.96; P=.02),[7]. With PBT, balance adaptation may occur faster, potentially achieving equal or better results with fewer training sessions compared to conventional balance training,[8].

However promising, even effective interventions are likely to fail if they are not acceptable to the target population. The more acceptable the intervention, the more likely that adherence will be high,[9]. In turn, higher adherence (>80%) may result in larger effects,[10]. Due to the nature of the intervention, the question arises whether acceptability is an issue in PBT. In 2019, Okubo et al found in a pilot study of 10 healthy older adults that self-reported anxiety levels before a training session increased significantly with increasing unpredictability of PBT,[11]. Unpredictable perturbations are required in PBT to maximize learning of reactive balance control, yet these perturbations may cause anxiety and consequentially decrease acceptability.

So far limited evidence exists about the acceptability of PBT. Previous studies reported high training adherence rates, and no significant differences in drop-out rates between PBT and control groups receiving exercise or flexibility training,[12-14]. However, while quantitative data such as adherence rates may be indirect indicators of acceptability, the full-fledged concept of acceptability is a subjective evaluation made by individuals who experience an intervention,[9]. In 2017, Sekhon et al., proposed the Theoretical Framework of Acceptability (TFA) in which acceptability is viewed as a multifaceted construct, consisting of seven components;[9].

To our knowledge, no studies thus far have focused on qualitative aspects of acceptability of PBT in older adults. The aim of this study is to explore acceptability of PBT as perceived by older adults with a recent history of falls. Their views on the components constituting acceptability will be explored. The findings will enable optimisation of future implementation of PBT in clinical practice.

## METHODS

### Study design

A qualitative study consisting of semi-structured interviews was conducted. All participants provided written informed consent. This study was approved by the Medical Ethics Committee of MUMC+ (Maastricht University Medical Center) and Maastricht University (METC NL67131.068.18). The study is reported in line with the COREQ statement,[15].

### Context, study participants and sampling

Older adults who participated in PBT as part of a RCT were included,[16]. Community-dwelling older adults (age  $\geq 65$  years) who visited the hospital's outpatient clinic due to a fall incident were informed about the study, and approached by telephone a 3-7 days later. Participants were included in the RCT if they were able to walk for 15 minutes without a walking aid. Exclusion criteria included any risk factors to them participating in PBT (e.g. diagnosed osteoporosis, severe cardiopulmonary disease), or inability to communicate in Dutch. Participants were eligible for the qualitative interviews after they had completed the PBT. They were selected through a combination of typical case and purposive sampling, to select those participants who were representative of the study population and were expected to provide the most detailed input.

The PBT protocol consisted of three 30-minute sessions, during which participants were exposed to sudden balance perturbations while they stood and walked on a dual-belt treadmill embedded in a moveable platform (Computer Assisted Rehabilitation Environment (CAREN), Motek Medical BV). During the training, virtual environments were projected on a 180° screen in front of the platform. Each session consisted of three standardized conditions, while progression of difficulty levels in each condition was individualized.

1. Gait adaptability: participants walked on the treadmill while a virtual environment of a forest road, with various slopes and turns, was projected onto the screen. The platform moved correspondingly.
2. Static reactive balance: participants stood on the platform while the platform and treadmill made sudden, variable and unpredictable movements to perturb balance.
3. Dynamic reactive balance: this training condition was similar to the one above, only the perturbations were applied while the participant was walking on the treadmill.

A detailed description of the PBT protocol is published elsewhere,[16]. For an impression of the PBT setting, see Figure 1.

### Insert Figure 1

*Figure 1: Picture of a participant during PBT. Picture published with participant's permission.*

### Theoretical framework

The interviews were based on the TFA as proposed by Sekhon et al.,[9]. In this framework, acceptability is defined as a multi-faceted, seven component construct, including: affective attitude, burden, ethicality, intervention coherence, opportunity costs, perceived effectiveness and self-efficacy. *Table 1* provides an overview of our operationalisation of each construct and an example of a related

question from our interview guide. Questions regarding context-specific barriers and facilitators (e.g. training location, supervision during training) to participate in PBT were added to gain insight in their influence on PBT acceptability.

**Table 1: Theoretical framework of acceptability themes and interpretation.**

| THEME                          | INTERPRETATION                                                                                                                                                                                                             |
|--------------------------------|----------------------------------------------------------------------------------------------------------------------------------------------------------------------------------------------------------------------------|
| <b>AFFECTIVE ATTITUDE</b>      | How an individual feels about the PBT<br><i>How do you feel about the training? What made you feel this way?</i>                                                                                                           |
| <b>SELF-EFFICACY</b>           | The participant's confidence in their ability to perform the PBT<br><i>How did you do in the training?</i>                                                                                                                 |
| <b>PERCEIVED EFFECTIVENESS</b> | The extent to which the participant perceives the PBT to potentially and actually (observed) be effective<br><i>To what extent did you experience effects from the training?</i>                                           |
| <b>ETHICALITY</b>              | The extent to which the intervention had good fit with an individual's value system and expectations of a falls prevention intervention<br><i>To what extent did the training fit with your views on falls prevention?</i> |
| <b>INTERVENTION COHERENCE</b>  | The extent to which the participant understands the aim of PBT and how it works<br><i>In your own words, what was the aim of the training?</i>                                                                             |
| <b>BURDEN</b>                  | The perceived amount of effort that was required to participate in the PBT<br><i>To what extent did you find the training strenuous? To what extent did you find the training challenging?</i>                             |
| <b>OPPORTUNITY COSTS</b>       | The extent to which benefits, profits or values were given up to participate in the PBT<br><i>To what extent did you forego other opportunities to participate in the training?</i>                                        |

PBT; perturbation-based balance training

### Interview procedure

The interviews took place at the hospital, within one to three weeks after training completion, between February 2020 and May 2021. Interviews and analysis were completed before results on the effectiveness of the PBT protocol were analysed. The first 13 interviews (of in total 16) were led by a researcher (MG) who was involved in the PBT program, because she was familiar with the specifics of the training and could ask targeted follow-up questions. A second researcher was always present at the interviews as an observer, to help keep track of the interview guide, and take field notes. A verbal summary was given at the end of each interview and a written summary was sent to each participant for a member check. Interviews were conducted iteratively; the interview guide was adjusted after the first 3 interviews to include emerging themes. This process was repeated after 10 and 13 interviews were completed. All interviews were recorded using a digital voicerecorder and transcribed verbatim. Any names and other possible identification information were removed from the transcripts. As the interviews and transcripts were in Dutch, all quotes presented were translated with care to conserve the original meaning.

### Analysis

Interview transcripts were analysed using a template analysis approach,[17, 18]. The a priori template was formed based on the TFA and interview guide. Two researchers (MG and JS) independently coded



the first three interviews, using NVivo 12,[19]. After coding, they discussed the codes until consensus and formed an initial template. This process was repeated for the next three interviews. Consensus was then reached that this third template version covered the transcripts that were analysed so far. MG subsequently coded the remaining interviews using the third template version. MG and JS discussed if any changes needed to be made to the template based on the later interviews. After the 9<sup>th</sup> interview was coded, no more changes to the template were indicated. This was confirmed by coding the remaining 4 interviews, and coding saturation was reached,[20].

### Reflexivity and triangulation

As MG was involved in the PBT for these participants, it was possible that there was researcher bias or that participants were more inclined to give desirable answers. For the purpose of interviewer triangulation, three additional interviews (interviews 14-16) were conducted by an independent researcher (AW) to confirm or reject previous responses. Coding of these three interviews revealed no new codes, which can be interpreted as secondary confirmation of the coding template and saturation. Participants did not give different answers to different interviewers. JS and AW were not involved in the RCT on PBT and represented an outsider perspective in the design and review of the interview guide, coding and analysis, therewith contributing to further researcher triangulation. Through comparison and discussion of the transcripts, the authors then reached consensus on the most important themes from the interviews.

### Patient and public involvement

Patients were first involved in pilot testing of the PBT protocol in this research, and the training protocol was fine-tuned based on their feedback. The aim of this study is to explore participant's perceptions and views on the acceptability of the training, which may be used to guide design or implementation of future PBT interventions.

## RESULTS

### Participant description

Sixteen participants (14 females and 2 males, mean age  $73.6 \pm 6.0$  years) were approached, all of which accepted. For comparison, the RCT included 66 females and 17 males, and participants' mean age was  $72.9 \pm 5.3$  years. Table 2 provides an overview of participants and characteristics. Nine interviews were conducted at the hospital, seven were telephone interviews due to restrictions related to the COVID-19 pandemic. Interviews lasted 15-35 minutes. One participant (P031) missed one training session due to COVID-19 restrictions.

**Table 2: Overview of participant and interview characteristics.**

| Participant | Sex (F/M) | Age (years) | Falls previous year (n) | Interview type | Interviewer |
|-------------|-----------|-------------|-------------------------|----------------|-------------|
| P022        | F         | 79          | 1                       | Face-to-face   | MG          |
| P023        | F         | 80          | 1                       | Face-to-face   | MG          |
| P026        | M         | 65          | 1                       | Telephone      | MG          |
| P027        | F         | 76          | 2                       | Face-to-face   | MG          |
| P030        | F         | 83          | 1                       | Telephone      | MG          |
| P031        | M         | 67          | 1                       | Telephone      | MG          |
| P032        | F         | 79          | 1                       | Telephone      | MG          |
| P040        | F         | 73          | 2                       | Face-to-face   | MG          |
| P042        | F         | 65          | 2                       | Face-to-face   | MG          |
| P043        | F         | 74          | 1                       | Face-to-face   | MG          |

|      |   |    |   |              |    |
|------|---|----|---|--------------|----|
| P044 | F | 79 | 4 | Face-to-face | MG |
| P045 | F | 74 | 1 | Face-to-face | MG |
| P050 | F | 79 | 1 | Face-to-face | MG |
| P068 | F | 70 | 1 | Telephone    | AW |
| P069 | F | 66 | 3 | Telephone    | AW |
| P082 | F | 69 | 1 | Telephone    | AW |

*F = female, M = male.*

### Perceptions of acceptability

The findings are presented below for each of the TFA components, along with illustrative quotes from participants. The theme 'training setting' was added, this theme includes context-specific barriers and facilitators that were described by the participants.

#### Affective attitude

Overall, participants described that they felt the PBT was an enjoyable experience. Most participants positively related this to the novelty of the experience, reporting feelings of curiosity and excitement. In contrast, some participants related this novelty to a feeling of suspense, and sometimes feeling unsure about their ability to participate in PBT at the start of the first training session. Most often this was described as a good amount of suspense and curiosity about what would happen, and not perceived as a barrier.

P044 *"I didn't know what I could expect. But I said: Guys, I'll just see what happens, I'll leave it up to you. (...) In the beginning, you don't know what is going to happen to you. You feel a little insecure. But I was glad that I did it."*

One participant described feeling anxious during the first training session, a feeling that fortunately decreased throughout the following sessions.

P030 *"Now you know what you have to do so it's different. But at first it's kind of a startle response I think."*

All participants reported that feeling safe and able to challenge themselves without fear of falling was closely related to a positive experience. The safety equipment (especially the safety harness), feeling heard by the trainer and receiving information during the training session were identified as important facilitators.

P050 *"And again, (laughing) I was very happy that I didn't need to hang from those ropes [safety harness], but I had complete faith that if anything were to happen I definitely would not fall. So that didn't cause any anxiety for me."*

#### Self-efficacy

All participants described that they were able to participate in the training sessions, and that they felt they did well. Some participants reported that their sense of self-efficacy grew throughout the training sessions, starting with feeling unsure about their ability at the first training session, to feeling accomplished after the second or third session. Some of these participants related their initial apprehension to comorbidities.

P031 *"I have COPD and you're aware that there are situations in which you may have to drop out. And in that sense, this could have happened to me in this training as well. Fortunately, it didn't."*

Finally, one participant provided an example of how she felt after the training sessions.

1  
2  
3 P022 *“Well, I can say that I feel I did well. It brings you joy if you have something like that (decreased*  
4 *strength in one leg due to a comorbidity) and you’re still able to catch yourself well.”*

### 6 **Perceived effectiveness**

7 This construct is understood as the extent to which participants perceived changes in their physical  
8 or psychological functioning, and attributed this to the training. Perceived training effects can be  
9 divided into physical and psychological effects. For most participants, recognizing physical training  
10 effects was not straightforward. Some participants clearly described improvements in their daily  
11 activities which they attributed to the training, such as improved walking ability or balance.

12  
13  
14 P068. *“I’ve been walking my son’s dog a lot lately. (...) I’ve noticed that because of that (training) I’m*  
15 *steadier on my legs. Like this morning when I walked him, I had to walk downhill. And before I did the*  
16 *balance training, I would have thought ‘Oh I have to be careful’, but now I just know: I have to move*  
17 *like this, I have to put my foot here. And I can do this.”*

18  
19 Still, most participants expressed that their physical abilities had remained the same, and wondered  
20 how they could have noticed possible changes due to training. For most, falling or stumbling was not  
21 a daily occurrence to begin with, and as the interviews took place shortly after training completion,  
22 they noted that potential changes were not easily identifiable in this short term. This was neither  
23 described as a barrier nor a facilitator to participating in the PBT.

24  
25  
26 P031. *“But if my balance has improved because of it, that’s very hard to determine, because I don’t fall*  
27 *very often. That I broke my wrist due to a fall was more of an accident.”*

28  
29 Psychological effects were described as much more apparent and positively related to the acceptability  
30 of the intervention. Most participants expressed that the training had helped them gain confidence  
31 and improved self-efficacy, during the training sessions and in everyday life. They attributed this to  
32 how during the training they experienced that their body was capable of more than they expected.

33  
34 P068. *“Especially the first time I noticed that I was quite insecure. (...) And that was more related to my*  
35 *confidence, which had been damaged. And I noticed after a few times that I, because of the training*  
36 *actually, gained some confidence. That I got more confident in my body.”*

### 38 **Ethicality**

39 This construct may not only be related to the extent to which the PBT was perceived to be a good fit  
40 with the participant’s value system, but also to their expectations of the PBT. Most participants  
41 reported that anything they could do to prevent future fall incidents was viewed as valuable.

42  
43  
44 P069 *“Well, I was really glad about it, because I thought ‘anything I can practice or do to help me fall*  
45 *less, will be helpful’ ”*

46  
47 Some participants found it hard to describe if falls prevention in general fit within their value system.  
48 Often participants related this to not having heard or thought about falls prevention until they were  
49 approached by the study team.

50  
51 P032 *“I hadn’t heard or read anything about it before, I started this without expectations.”*

52  
53 Some also described having thought about it but not knowing who to approach about the topic, or not  
54 considering that they needed it. The lack of prior knowledge or expectations about the PBT was not  
55 perceived as a barrier to participating. Conclusively, some participants valued being able to contribute  
56 to a scientific study.

### Intervention Coherence

All participants were able to recognize and describe the aim of the intervention to a certain degree. For example:

P023 *"In my own words? That you're more able to keep your balance. And it has worked."*

Another participant provided a more detailed explanation of what she perceived as the aim of the intervention.

P043 *"To be able to recover, when you've lost balance. I think that that was the aim. That you're able to react; your body, your legs, or even with the help of an arm swing. Faster recovery to regain your balance."*

A factor that repeatedly emerged related to coherence of the intervention, is 'intervention validity'; understood as the extent to which participants perceived that the intervention had a good fit with its' aims. Most participants who discussed this topic, described the intervention as valid and perceived this as a facilitator to participating in PBT.

P026 *"A few times I nearly fell, but then you're able to correct this and it's a beautiful simulation of what can happen in real life. Especially when the treadmill belts don't run at the same speed, when one decelerates while the other continues. Then you get an effect like you're experiencing a slip."*

However, a few participants also questioned if it was at all possible to prevent a future fall incident, reasoning that a fall occurs too sudden to make any preventive adjustments.

### Burden

Participants agreed that the burden of participating in PBT was acceptable. The training was perceived as challenging, but not too challenging. Some participants positively related this to the way the training sessions were structured, providing a gradual and personalized increase in challenge.

P069 *"No, there was a good and gradual increase in challenge. They started the training quite easy and then it gradually became harder. It was very well structured."*

Most effort was required to maintain or regain balance, and to stay focused throughout the session. Participants reported that the required physical stamina was not an important contributing factor to the perceived training load. When mentioned, participants described that the unexpected balance perturbations were perceived as more challenging than the first part of the training, where they could anticipate on what would happen next.

P022 *"The hard part was when it was sudden, unexpected. Going left, right, forward. That was, well, not hard; you can get it done, but you have to make sure you don't fall, even if you're in a safety harness."*

### Opportunity costs

Participants agreed that no activities had to be given up to participate in the PBT. Most related this to having enough time after retirement. The possibility to schedule the training sessions in consultation with the trainer instead of having fixed training times was reported as an important facilitator. Most participants accepted travelling to the training location as a fact and did not describe this as either a barrier or a facilitator. A few participants found the central location of the hospital a positive factor, as this was easy to reach using public transportation. Another few participants described that any location outside walking distance provided a challenge and a potential barrier, as they were no longer able to drive a car and had to rely on public transportation or family members to get there. As for the training location being inside a university hospital, this was mostly perceived as an advantage. Participants often described that they thought this was the logical place where they expected to find

1  
2  
3 the right equipment and expertise for this kind of training. Some also mentioned that they regarded  
4 the university hospital as a familiar institute, and therefore easy to find.  
5

### 6 **Training setting**

7 This additional theme was identified throughout the interviews, and includes specific factors related  
8 to the setting of the PBT. The PBT took place in a specific setting with specialized technological  
9 equipment (see *Figure 1*) inside a university hospital. Most participants described that they  
10 experienced the technological training equipment as positive, as a surprising and interesting novelty.  
11 One participant explained that she felt slightly overwhelmed when she first saw the training  
12 equipment, but this improved when she got a more detailed explanation of what was going to  
13 happen and when she experienced the training for herself.  
14  
15

16 P031. *"The setting was very surprising. The fact that you're walking on a treadmill in an environment*  
17 *that moves with you. I thought it was a very extraordinary experience."*  
18

19 Most participants described the virtual environments that were used during training as surprising and  
20 positive. A few participants expressed a preference for the first virtual environment (the forest road),  
21 describing that this felt more friendly and stimulating than the second, more industrial environment.  
22

23 The individual nature of this training was clearly valued by some participants, while others were  
24 ambivalent about this. Participants who indicated a preference for training individually, described that  
25 they enjoyed being able to really focus on the training itself without distractions from other people or  
26 the environment, and to train at their own level. Some also reasoned that this increased the potential  
27 of the training to be effective.  
28

29 P068. *"This, the balance training, is not something you can do in a group. And I just thought it was very*  
30 *pleasant, because you're focusing on yourself. You're focused on what is going to happen, and you can*  
31 *feel everything that happens (...). And I just think that it is much more pleasant this way, and it will be*  
32 *more helpful."*  
33  
34

35 While most participants preferred training individually, some described that they were curious to see  
36 how other people performed during the training sessions. Additionally, two participants would have  
37 appreciated the opportunity to compare and discuss fall-related experiences with peers.  
38

39 A numeric rating scale (NRS) was used as a tool to individualize training progression. During the training  
40 sessions, participants were regularly asked to score how challenged they felt at that moment, ranging  
41 from 0 (not challenged at all) to 10 (highest perceivable challenge). Participants described mixed  
42 experiences with this system. Some found the scoring easy and even helpful and described that it  
43 helped them gain insight in how they felt at that moment. Others described that they had trouble  
44 translating their subjective experience to a number that meant little to them. Overall, the NRS scoring  
45 was not perceived as an important barrier or facilitator.  
46  
47

### 48 **DISCUSSION**

49 The aim of this study was to evaluate the acceptability of a PBT program as perceived by older adults,  
50 using the TFA. Gaining understanding of the acceptability of PBT in older adults with a recent history  
51 of falls is imperative to enable and optimize future implementation of PBT in clinical practice.  
52

53 The results indicate that this PBT protocol is perceived as acceptable by older adults with a recent  
54 history of falls and highlight key areas for potential future modifications. Besides the TFA, one  
55 additional theme emerged from the data, which includes challenges specific to the training setting  
56 such as preference for group training in some participants and travel to the training location.  
57  
58  
59  
60

1  
2  
3 Participants valued being able to feel safe during training. Most reported that this was accomplished  
4 by using the safety harness, the physical presence and guidance from the trainer, and individualized  
5 training progression. These results reflect those of Miller et al., who evaluated the perceived  
6 acceptability of conceptually challenging exercise training to older adults, including dynamic balance  
7 tasks with external perturbations,[21]. The novelty of the training and technology were regarded as a  
8 positive factor contributing to enjoyment by most participants. However, as in Miller's study, some  
9 participants reported feeling initially apprehensive or anxious towards the new training. Okubo et  
10 al.,[11], related elevated anxiety levels during PBT to the unpredictability of the perturbations. We  
11 previously hypothesized that a more gradual training progression over multiple sessions may help  
12 participants build confidence and alleviate anxiety while still being effective,[22]. This hypothesis is  
13 partially confirmed by our current findings, which indicated that self-efficacy improved over time.  
14 Participants who initially experienced anxiety also reported that this improved over time, and  
15 individualized training progression was reported as a facilitator to feeling safe during training. As  
16 unexpected perturbations are key for task-specific PBT, the balance between measures to alleviate  
17 anxiety while still achieving the desired training stimulus should be considered in future  
18 implementation. Our findings suggest that this may be particularly important at the start of training.  
19  
20  
21

22 Perceived psychological effects in the form of increased confidence in balance abilities, and increased  
23 self-efficacy in daily life were often reported. Consistent with previous studies on falls prevention  
24 interventions, participants described that the PBT helped them gain insight in their ability level and  
25 were pleasantly surprised by their ability,[21, 23]. This is important as maintaining balance confidence  
26 can help avoid undue activity avoidance and subsequent disability,[24]. Moreover, decreased balance  
27 confidence has been identified as a predictor for future falls,[25]. While participants generally felt they  
28 did well during training, perceived physical effects in daily life were less apparent. Participants  
29 questioned how they would notice physical training effects, as falling was not a daily occurrence for  
30 them to begin with. In part, this may have been related to the interviews taking place shortly after  
31 training completion, leaving little time for participants to experience training effects. However, we  
32 hypothesize that this may also be related to the perceived intervention validity and ethicality.  
33  
34  
35

36 While the topic of perceived intervention validity emerged in most of the interviews, participants views  
37 were mixed. Some described that they perceived the intervention valid as it clearly simulated daily-life  
38 balance perturbations. In contrast, other participants did not discuss PBT specifically, rather  
39 questioned if it was at all possible to prevent a fall in daily life, describing that falls occurred too sudden  
40 to intervene or were 'just accidents that could happen to anybody'. The belief that falls are just bad  
41 luck, and disbelief that they are preventable is well-known from the literature,[26-28]. A review by  
42 McInnes et al. recommended that these beliefs should be countered prior to intervention,[29]. While  
43 all participants in our study had recently fallen and agreed to participate in the current intervention,  
44 none of them actively sought to participate in falls prevention before. Participants described that they  
45 had previously given little or no thought to falls prevention, or that they did not think they needed it.  
46 This is in line with previous studies, indicating that those who have previously fallen are not necessarily  
47 more likely to be receptive to falls prevention interventions,[30, 31]. Another study described that  
48 older adults may reject the idea that they need falls prevention because they regard themselves as  
49 healthy and able to manage,[32]. PBT being a relatively new intervention, it may be assumed that this  
50 intervention is even less known to potential participants, thus increasing the challenge to reach the  
51 target population. Some participants reported that being informed by or talking to a health practitioner  
52 about the PBT, and being approached by the researchers, prompted them to consider falls prevention  
53 or to finally participate. This corroborates findings from Yardley et al., reporting that a personal  
54 invitation by a health practitioner may be a facilitating factor to participation in falls prevention,[33].  
55 Our findings suggest that these factors may be particularly important to consider for PBT or any  
56 relatively unknown intervention, to effectively reach older adults.  
57  
58  
59  
60

1  
2  
3 Some participants clearly expressed a preference for training individually. Others described that they  
4 would have been curious to see how others performed during the training sessions, or to share fall-  
5 related experiences with others. Promoting the social value of falls prevention interventions has been  
6 previously identified as a facilitator,[29]. Additionally, watching or partnering with a peer completing  
7 the same exercises may facilitate participation and improve older adults' confidence for their own  
8 attempt,[21, 34, 35]. As PBT is currently not suited for a group intervention, it may be considered to  
9 provide a medium between individual and group training, while simultaneously addressing the initial  
10 apprehension or anxiety experienced by some participants. Specifically, this could be achieved by  
11 providing new participants with a video of a peer completing the exercises before their own  
12 participation, or combining training sessions of two participants where they can see each other  
13 perform and share experiences. Conclusively, hearing experiences from peers who completed the PBT  
14 might also improve perceived intervention validity and ethicality for future participants.  
15  
16  
17

18 Finally, a practical factor that should be considered is travelling to the training location. As is the case  
19 with most set-ups for PBT, the equipment used in this program is not yet available in many locations.  
20 Some participants described that while they were able to attend the PBT sessions, travel was a  
21 potential barrier. This barrier is well-known in this population, as some older adults are no longer able  
22 to drive a car themselves and thus depend on family members or public transportation,[33, 36].  
23  
24

### 25 **Strengths and Limitations**

26 To our knowledge, this is the first study to use the TFA to examine older adults' perceived acceptability  
27 of PBT. Using the TFA enabled a systematic approach to define and assess intervention  
28 acceptability,[9]. Triangulation was applied in data collection as well as data analysis to increase  
29 trustworthiness of the research findings. A few limitations should be considered when interpreting the  
30 results of our study. First, the PBT intervention was applied in a research setting, meaning that some  
31 specific factors, such as willingness to pay for participation in the intervention, were not evaluated.  
32 Second, the results only reflect the perceived retrospective acceptability of the PBT. Further research  
33 is necessary to evaluate prospective and concurrent acceptability, to further elucidate what factors  
34 motivate or prevent older adults from participating in PBT,[9].  
35  
36

37 A final consideration is that due to COVID-19 related restrictions, 7 out of the 16 interviews in this  
38 study were telephone interviews. While face-to-face interviews are often regarded as the gold  
39 standard, there is little evidence that quality of findings collected through telephone interviews is  
40 compromised,[37]. Consistent with Sturges et al., we identified no clear differences between data  
41 collected through face-to-face interviews compared to telephone interviews in our study,[38].  
42  
43

### 44 **CONCLUSIONS**

45 In conclusion, findings from this study indicate that a technology-assisted PBT program is acceptable  
46 to older adults with a recent falls history. Enjoyment of the intervention, being able to feel safe,  
47 perceived psychological effectiveness and individualized training progression were identified as  
48 important factors contributing to the perceived acceptability. Increasing the social aspect of training  
49 and sharing experiences of peers may be considered to enhance acceptability to new participants who  
50 initially feel apprehensive or anxious about their ability to participate, or who are unsure what to  
51 expect. Raising awareness of the importance and possibilities of falls prevention training in general is  
52 a challenge in this population.  
53  
54  
55

### 56 **Acknowledgements**

57 We thank Anouk Weemaes for her contribution in conducting the interviews in this study.  
58  
59

### 60 **Ethics statement**

1  
2  
3 All participants provided written informed consent. This study was approved by the Medical Ethics  
4 Committee of MUMC+ (Maastricht University Medical Center) and Maastricht University (METC  
5 NL67131.068.18).  
6

### 7 **Competing interest**

8  
9 The authors declare no competing interests.  
10

### 11 **Funding**

12 This research received no specific grant from any funding agency in the public, commercial or not-for-  
13 profit sectors.  
14

### 15 **Contributorship statement**

16 Marissa Gerards: Conceptualization, Methodology, Validation, Formal Analysis, Investigation, Data  
17 Curation, Writing – Original Draft, Visualization, Project Administration. Judith Sieben: Methodology,  
18 Validation, Formal Analysis, Data Curation, Writing – Review & Editing. Rik Marcellis:  
19 Conceptualization, Writing – Review & Editing. Rob de Bie: Conceptualization, Writing – Review &  
20 Editing, Supervision. Kenneth Meijer: Conceptualization, Writing – Review & Editing, Supervision.  
21 Antoine Lenssen: Conceptualization, Writing – Review & Editing, Supervision, Project Administration.  
22 Anouk Weemaes: Investigation.  
23  
24  
25

### 26 **Data availability**

27 No additional data available.  
28

### 29 **REFERENCES**

- 30  
31  
32 1 Sherrington C, Fairhall NJ, Wallbank GK, et al. Exercise for preventing falls in older people living in  
33 the community. *Cochrane Database Syst Rev* 2019;1. doi: 10.1002/14651858.CD012424.pub2  
34  
35 2 Rieger MM, Papegaaij S, Steenbrink F, et al. Perturbation-based gait training to improve daily life gait  
36 stability in older adults at risk of falling: protocol for the REACT randomized controlled trial. *BMC*  
37 *Geriatr* 2020;20(1):167. doi: 10.1186/s12877-020-01566-z  
38  
39 3 Bunn F, Dickinson A, Barnett-Page E, et al. A systematic review of older people's perceptions of  
40 facilitators and barriers to participation in falls-prevention interventions. *Ageing Soc* 2008;28(4):449-  
41 72. doi:10.1017/S0144686X07006861  
42  
43 4 Berg WP, Alessio HM, Mills EM, et al. Circumstances and consequences of falls in independent  
44 community-dwelling older adults. *Age Ageing* 1997;26(4):261-8. doi: 10.1093/ageing/26.4.261  
45  
46 5 Talbot LA MR, Witham EK, Metter EJ. Falls in young, middle-aged and older community dwelling  
47 adults: perceived cause, environmental factors and injury. *BMC Public Health* 2005;5. doi:  
48 10.1186/1471-2458-5-86  
49  
50 6 Maki BE, McIlroy WE. Change-in-support balance reactions in older persons: an emerging research  
51 area of clinical importance. *Neurol Clin* 2005;23(3):751-83. doi: 10.1016/j.ncl.2005.01.002  
52  
53 7 Mansfield A, Wong JS, Bryce J, et al. Does perturbation-based balance training prevent falls?  
54 Systematic review and meta-analysis of preliminary randomized controlled trials. *Phys Ther*  
55 2015;95(5):700-9. doi: 10.2522/ptj.20140090  
56  
57 8 Pai YC, Bhatt T, Yang F, et al. Perturbation training can reduce community-dwelling older adults'  
58 annual fall risk: a randomized controlled trial. *J Gerontol A Biol Sci Med Sci* 2014;69(12):1586-94. doi:  
59 10.1093/gerona/glu087  
60



- 1  
2  
3 9 Sekhon M, Cartwright M, Francis JJ. Acceptability of healthcare interventions: an overview of reviews  
4 and development of a theoretical framework. *BMC Health Serv Res* 2017;17(1):88. doi:  
5 10.1186/s12913-017-2031-8  
6
- 7 10 Osho O, Owoye O, Armijo-Olivo S. Adherence and Attrition in Fall Prevention Exercise Programs  
8 for Community-Dwelling Older Adults: A Systematic Review and Meta-Analysis. *J Aging Phys Act*  
9 2018;26(2):304-26. doi: 10.1123/japa.2016-0326  
10
- 11 11 Okubo Y, Brodie MA, Sturnieks DL, et al. A pilot study of reactive balance training using trips and  
12 slips with increasing unpredictability in young and older adults: Biomechanical mechanisms, falls and  
13 clinical feasibility. *Clin Biomech (Bristol, Avon)* 2019;67:171-9. doi: 10.1016/j.clinbiomech.2019.05.016  
14
- 15 12 Kurz I, Gimmon Y, Shapiro A, et al. Unexpected perturbations training improves balance control and  
16 voluntary stepping times in older adults - a double blind randomized control trial. *BMC geriatr*  
17 2016;16:58. doi: 10.1186/s12877-016-0223-4  
18
- 19 13 Lurie JD, Zagaria AB, Pidgeon DM, et al. Pilot comparative effectiveness study of surface  
20 perturbation treadmill training to prevent falls in older adults. *BMC Geriatr* 2013;13:49. doi:  
21 10.1186/1471-2318-13-49  
22
- 23 14 Mansfield A, Peters AL, Liu BA, et al. Effect of a perturbation-based balance training program on  
24 compensatory stepping and grasping reactions in older adults: a randomized controlled trial. *Phys Ther*  
25 2010;90(4):476-91. doi: 10.2522/ptj.20090070  
26
- 27 15 Tong A, Sainsbury P, Craig J. Consolidated criteria for reporting qualitative research (COREQ): a 32-  
28 item checklist for interviews and focus groups. *Int J Qual Health Care* 2007;19(6):349-57. doi:  
29 10.1093/intqhc/mzm042  
30
- 31 16 Gerards MHG, Marcellis RGJ, Poeze M, et al. Perturbation-based balance training to improve  
32 balance control and reduce falls in older adults – study protocol for a randomized controlled trial. *BMC*  
33 *Geriatr* 2021;21(1):9. doi: 10.1186/s12877-020-01944-7  
34
- 35 17 Brooks J, McCluskey S, Turley E, et al. The Utility of Template Analysis in Qualitative Psychology  
36 Research. *Qual Res Psychol* 2015;12(2):202-22. doi: 10.1080/14780887.2014.955224  
37
- 38 18 King N. Template analysis. *Qualitative methods and analysis in organizational research: A practical*  
39 *guide*. Thousand Oaks, CA: Sage Publications Ltd 1998:118-34.  
40
- 41 19 QSR International Pty Ltd. NVivo qualitative data analysis software, version 12 2018.  
42
- 43 20 Saunders B, Sim J, Kingstone T, et al. Saturation in qualitative research: exploring its  
44 conceptualization and operationalization. *Qual Quant* 2018;52(4):1893-907. doi: 10.1007/s11135-017-  
45 0574-8  
46
- 47 21 Miller CT, Teychenne M, Maple J-L. The perceived feasibility and acceptability of a conceptually  
48 challenging exercise training program in older adults. *Clin Interv Aging* 2018;13:451-61. doi:  
49 10.2147/CIA.S154664  
50
- 51 22 Gerards MHG, McCrum C, Mansfield A, et al. Perturbation-based balance training for falls reduction  
52 among older adults: Current evidence and implications for clinical practice. *Geriatr Gerontol Int*  
53 2017;17(12):2294-303. doi: 10.1111/ggi.13082  
54
- 55 23 Davis JC, Dian L, Parmar N, et al. Geriatrician-led evidence-based Falls Prevention Clinic: a  
56 prospective 12-month feasibility and acceptability cohort study among older adults. *BMJ Open*  
57 2018;8(12):e020576. doi: 10.1136/bmjopen-2017-020576  
58  
59  
60

- 1  
2  
3 24 Büla CJ, Monod S, Hoskovec C, et al. Interventions aiming at balance confidence improvement in  
4 older adults: an updated review. *Gerontology* 2011;57(3):276-86. doi: 10.1159/000322241  
5
- 6 25 Landers MR, Oscar S, Sasaoka J, et al. Balance Confidence and Fear of Falling Avoidance Behavior  
7 Are Most Predictive of Falling in Older Adults: Prospective Analysis. *Phys Ther* 2016;96(4):433-42. doi:  
8 10.2522/ptj.20150184  
9
- 10 26 Commonwealth of Australia. Preventing Falls and Harm From Falls in Older People: Best Practice  
11 Guidelines for Australian Community Care 2009.  
12 <https://www.safetyandquality.gov.au/sites/default/files/migrated/Guidelines-COMM.pdf> Accessed  
13 19/08/2021  
14
- 15 27 Claire Ballinger SP. Falling from grace or into expert hands? Alternative accounts about falling in  
16 older people. *Br J Occup Ther* 2000;63(12):573-9. doi: 10.1177/030802260006301203  
17
- 18 28 Kong KS, Lee Fk FK, Mackenzie AE, et al. Psychosocial consequences of falling: the perspective of  
19 older Hong Kong Chinese who had experienced recent falls. *J Adv Nurs* 2002;37(3):234-42. doi:  
20 10.1046/j.1365-2648.2002.02094.x  
21
- 22 29 McInnes E, Askie L. Evidence Review on Older People's Views and Experiences of Falls Prevention  
23 Strategies. *Worldviews Evid Based Nurs* 2004;1(1):20-37. doi: 10.1111/j.1741-6787.2004.04013.x  
24
- 25 30 Cumming RG, Thomas M, Szonyi G, et al. Adherence to occupational therapist recommendations  
26 for home modifications for falls prevention. *Am J Occup Ther* 2001;55(6):641-8. doi:  
27 10.5014/ajot.55.6.641  
28
- 29 31 Edwards N, Lockett D, Aminzadeh F, et al. Predictors of Bath Grab-Bar Use among Community-Living  
30 Older Adults. *Can J Aging* 2003;22(2):217-27. doi:10.1017/S0714980800004530  
31
- 32 32 Allen A, Simpson JM. A primary care based fall prevention programme. *Physiother Theory Pract*  
33 1999;15(2):121-33. doi: 10.1080/095939899307810  
34
- 35 33 Yardley L, Donovan-Hall M, Francis K, et al. Attitudes and Beliefs That Predict Older People's  
36 Intention to Undertake Strength and Balance Training. *The Journals of Gerontology. Series B*  
37 2007;62(2):119-P25. doi: 10.1093/geronb/62.2.p119  
38
- 39 34 Bethancourt HJ, Rosenberg DE, Beatty T, et al. Barriers to and facilitators of physical activity  
40 program use among older adults. *Clin Med Res* 2014;12(1-2):10-20. doi: 10.3121/cmr.2013.1171  
41
- 42 35 Biedenweg K, Meischke H, Bohl A, et al. Understanding older adults' motivators and barriers to  
43 participating in organized programs supporting exercise behaviors. *J Prim Prev* 2014;35(1):1-11. doi:  
44 10.1007/s10935-013-0331-2  
45
- 46 36 Kiami SR, Sky R, Goodgold S. Facilitators and barriers to enrolling in falls prevention programming  
47 among community dwelling older adults. *Arch Gerontol Geriatr* 2019;82:106-13. doi:  
48 10.1016/j.archger.2019.01.006  
49
- 50 37 Novick G. Is there a bias against telephone interviews in qualitative research? *Res Nurs Health*  
51 2008;31(4):391-8. doi: 10.1002/nur.20259  
52
- 53 38 Sturges JE, Hanrahan KJ. Comparing Telephone and Face-to-Face Qualitative Interviewing: a  
54 Research Note. *Qual Res* 2004;4(1):107-18. doi: 10.1177/1468794104041110  
55  
56  
57  
58  
59  
60

1  
2  
3  
4  
5  
6  
7  
8  
9  
10  
11  
12  
13  
14  
15  
16  
17  
18  
19  
20  
21  
22  
23  
24  
25  
26  
27  
28  
29  
30  
31  
32  
33  
34  
35  
36  
37  
38  
39  
40  
41  
42  
43  
44  
45  
46  
47  
48  
49  
50  
51  
52  
53  
54  
55  
56  
57  
58  
59  
60

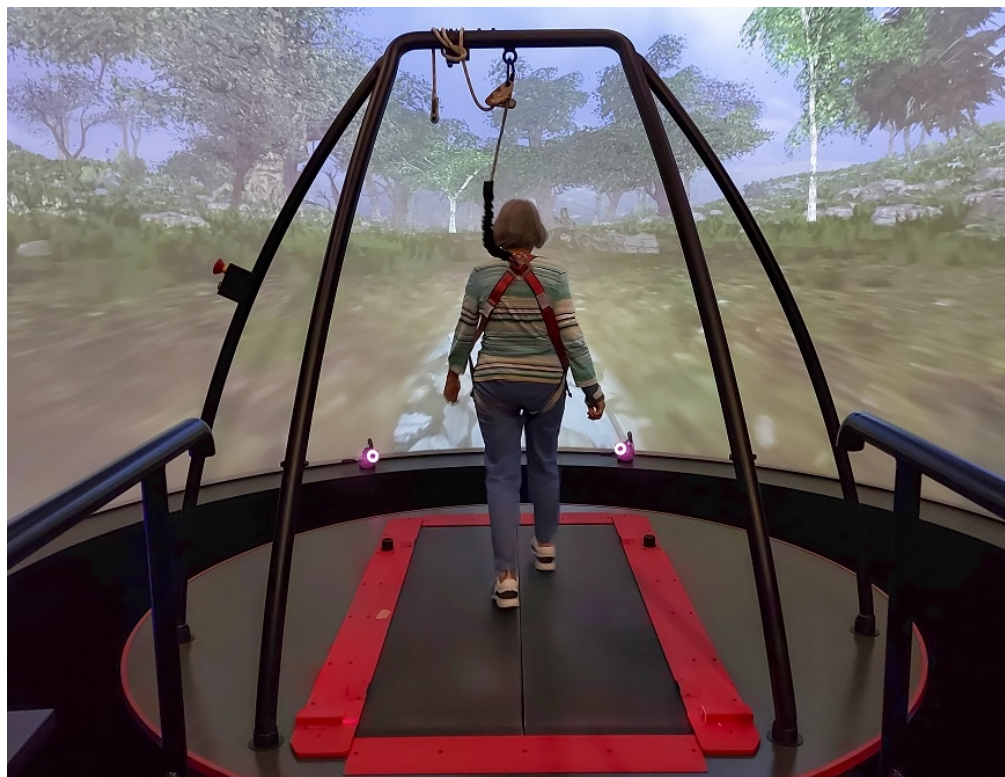

Figure 1: Picture of a participant during PBT. Picture published with participant’s permission.

73x56mm (300 x 300 DPI)

## COREQ (CONsolidated criteria for REporting Qualitative research) Checklist

A checklist of items that should be included in reports of qualitative research. You must report the page number in your manuscript where you consider each of the items listed in this checklist. If you have not included this information, either revise your manuscript accordingly before submitting or note N/A.

| Topic                                          | Item No. | Guide Questions/Description                                                                                                                              | Reported on Page No. |
|------------------------------------------------|----------|----------------------------------------------------------------------------------------------------------------------------------------------------------|----------------------|
| <b>Domain 1: Research team and reflexivity</b> |          |                                                                                                                                                          |                      |
| <i>Personal characteristics</i>                |          |                                                                                                                                                          |                      |
| Interviewer/facilitator                        | 1        | Which author/s conducted the interview or focus group?                                                                                                   |                      |
| Credentials                                    | 2        | What were the researcher's credentials? E.g. PhD, MD                                                                                                     |                      |
| Occupation                                     | 3        | What was their occupation at the time of the study?                                                                                                      |                      |
| Gender                                         | 4        | Was the researcher male or female?                                                                                                                       |                      |
| Experience and training                        | 5        | What experience or training did the researcher have?                                                                                                     |                      |
| <i>Relationship with participants</i>          |          |                                                                                                                                                          |                      |
| Relationship established                       | 6        | Was a relationship established prior to study commencement?                                                                                              |                      |
| Participant knowledge of the interviewer       | 7        | What did the participants know about the researcher? e.g. personal goals, reasons for doing the research                                                 |                      |
| Interviewer characteristics                    | 8        | What characteristics were reported about the interviewer/facilitator? e.g. Bias, assumptions, reasons and interests in the research topic                |                      |
| <b>Domain 2: Study design</b>                  |          |                                                                                                                                                          |                      |
| <i>Theoretical framework</i>                   |          |                                                                                                                                                          |                      |
| Methodological orientation and Theory          | 9        | What methodological orientation was stated to underpin the study? e.g. grounded theory, discourse analysis, ethnography, phenomenology, content analysis |                      |
| <i>Participant selection</i>                   |          |                                                                                                                                                          |                      |
| Sampling                                       | 10       | How were participants selected? e.g. purposive, convenience, consecutive, snowball                                                                       |                      |
| Method of approach                             | 11       | How were participants approached? e.g. face-to-face, telephone, mail, email                                                                              |                      |
| Sample size                                    | 12       | How many participants were in the study?                                                                                                                 |                      |
| Non-participation                              | 13       | How many people refused to participate or dropped out? Reasons?                                                                                          |                      |
| <i>Setting</i>                                 |          |                                                                                                                                                          |                      |
| Setting of data collection                     | 14       | Where was the data collected? e.g. home, clinic, workplace                                                                                               |                      |
| Presence of non-participants                   | 15       | Was anyone else present besides the participants and researchers?                                                                                        |                      |
| Description of sample                          | 16       | What are the important characteristics of the sample? e.g. demographic data, date                                                                        |                      |
| <i>Data collection</i>                         |          |                                                                                                                                                          |                      |
| Interview guide                                | 17       | Were questions, prompts, guides provided by the authors? Was it pilot tested?                                                                            |                      |
| Repeat interviews                              | 18       | Were repeat interviews carried out? If yes, how many?                                                                                                    |                      |
| Audio/visual recording                         | 19       | Did the research use audio or visual recording to collect the data?                                                                                      |                      |
| Field notes                                    | 20       | Were field notes made during and/or after the interview or focus group?                                                                                  |                      |
| Duration                                       | 21       | What was the duration of the interviews or focus group?                                                                                                  |                      |
| Data saturation                                | 22       | Was data saturation discussed?                                                                                                                           |                      |
| Transcripts returned                           | 23       | Were transcripts returned to participants for comment and/or                                                                                             |                      |

| Topic                                  | Item No. | Guide Questions/Description                                                                                                        | Reported on Page No. |
|----------------------------------------|----------|------------------------------------------------------------------------------------------------------------------------------------|----------------------|
|                                        |          | correction?                                                                                                                        |                      |
| <b>Domain 3: analysis and findings</b> |          |                                                                                                                                    |                      |
| <i>Data analysis</i>                   |          |                                                                                                                                    |                      |
| Number of data coders                  | 24       | How many data coders coded the data?                                                                                               |                      |
| Description of the coding tree         | 25       | Did authors provide a description of the coding tree?                                                                              |                      |
| Derivation of themes                   | 26       | Were themes identified in advance or derived from the data?                                                                        |                      |
| Software                               | 27       | What software, if applicable, was used to manage the data?                                                                         |                      |
| Participant checking                   | 28       | Did participants provide feedback on the findings?                                                                                 |                      |
| <i>Reporting</i>                       |          |                                                                                                                                    |                      |
| Quotations presented                   | 29       | Were participant quotations presented to illustrate the themes/findings?<br>Was each quotation identified? e.g. participant number |                      |
| Data and findings consistent           | 30       | Was there consistency between the data presented and the findings?                                                                 |                      |
| Clarity of major themes                | 31       | Were major themes clearly presented in the findings?                                                                               |                      |
| Clarity of minor themes                | 32       | Is there a description of diverse cases or discussion of minor themes?                                                             |                      |

Developed from: Tong A, Sainsbury P, Craig J. Consolidated criteria for reporting qualitative research (COREQ): a 32-item checklist for interviews and focus groups. *International Journal for Quality in Health Care*. 2007. Volume 19, Number 6: pp. 349 – 357

**Once you have completed this checklist, please save a copy and upload it as part of your submission. DO NOT include this checklist as part of the main manuscript document. It must be uploaded as a separate file.**

# BMJ Open

## Acceptability of a perturbation-based balance training program for falls prevention in older adults: a qualitative study

|                                 |                                                                                                                                                                                                                                                                                                                                                                                                                                                                                                                                                                                                |
|---------------------------------|------------------------------------------------------------------------------------------------------------------------------------------------------------------------------------------------------------------------------------------------------------------------------------------------------------------------------------------------------------------------------------------------------------------------------------------------------------------------------------------------------------------------------------------------------------------------------------------------|
| Journal:                        | <i>BMJ Open</i>                                                                                                                                                                                                                                                                                                                                                                                                                                                                                                                                                                                |
| Manuscript ID                   | bmjopen-2021-056623.R1                                                                                                                                                                                                                                                                                                                                                                                                                                                                                                                                                                         |
| Article Type:                   | Original research                                                                                                                                                                                                                                                                                                                                                                                                                                                                                                                                                                              |
| Date Submitted by the Author:   | 09-Dec-2021                                                                                                                                                                                                                                                                                                                                                                                                                                                                                                                                                                                    |
| Complete List of Authors:       | Gerards, Marissa; Maastricht University Medical Centre+, Physical Therapy; Maastricht University, Department of Epidemiology Sieben, Judith; Maastricht University, Department of Epidemiology; Maastricht University, Department of Anatomy and Embryology Marcellis, Rik; Maastricht University Medical Centre+, Department of Physical Therapy de Bie, Rob; Maastricht University, Department of Epidemiology Meijer, Kenneth; Maastricht University, Department of Nutrition and Movement Sciences Lenssen, Antoine; Maastricht University Medical Centre+, Department of Physical Therapy |
| <b>Primary Subject Heading</b>: | Geriatric medicine                                                                                                                                                                                                                                                                                                                                                                                                                                                                                                                                                                             |
| Secondary Subject Heading:      | Rehabilitation medicine, Evidence based practice, Qualitative research                                                                                                                                                                                                                                                                                                                                                                                                                                                                                                                         |
| Keywords:                       | GERIATRIC MEDICINE, PREVENTIVE MEDICINE, QUALITATIVE RESEARCH, REHABILITATION MEDICINE                                                                                                                                                                                                                                                                                                                                                                                                                                                                                                         |
|                                 |                                                                                                                                                                                                                                                                                                                                                                                                                                                                                                                                                                                                |

SCHOLARONE™  
Manuscripts



I, the Submitting Author has the right to grant and does grant on behalf of all authors of the Work (as defined in the below author licence), an exclusive licence and/or a non-exclusive licence for contributions from authors who are: i) UK Crown employees; ii) where BMJ has agreed a CC-BY licence shall apply, and/or iii) in accordance with the terms applicable for US Federal Government officers or employees acting as part of their official duties; on a worldwide, perpetual, irrevocable, royalty-free basis to BMJ Publishing Group Ltd ("BMJ") its licensees and where the relevant Journal is co-owned by BMJ to the co-owners of the Journal, to publish the Work in this journal and any other BMJ products and to exploit all rights, as set out in our [licence](#).

The Submitting Author accepts and understands that any supply made under these terms is made by BMJ to the Submitting Author unless you are acting as an employee on behalf of your employer or a postgraduate student of an affiliated institution which is paying any applicable article publishing charge ("APC") for Open Access articles. Where the Submitting Author wishes to make the Work available on an Open Access basis (and intends to pay the relevant APC), the terms of reuse of such Open Access shall be governed by a Creative Commons licence – details of these licences and which [Creative Commons](#) licence will apply to this Work are set out in our licence referred to above.

Other than as permitted in any relevant BMJ Author's Self Archiving Policies, I confirm this Work has not been accepted for publication elsewhere, is not being considered for publication elsewhere and does not duplicate material already published. I confirm all authors consent to publication of this Work and authorise the granting of this licence.

# Acceptability of a perturbation-based balance training program for falls prevention in older adults: a qualitative study

Marissa Gerards<sup>1,2\*</sup>, Judith Sieben<sup>2,3</sup>, Rik Marcellis<sup>1</sup>, Rob de Bie<sup>2</sup>, Kenneth Meijer<sup>4</sup>, Antoine Lenssen<sup>1</sup>

1. Department of Physical Therapy, Maastricht University Medical Center, Maastricht, The Netherlands

2. Department of Epidemiology, Care and Public Health Institute (CAPHRI), Maastricht University, Maastricht, The Netherlands

3. Department of Anatomy and Embryology, Maastricht University, Maastricht, The Netherlands

4. Department of Nutrition and Movement Sciences, School of Nutrition and Translational Research in Metabolism (NUTRIM), Maastricht University, Maastricht, The Netherlands

**Key words:** Balance, perturbation, falls prevention, older adults, accidental falls

\*Corresponding Author.

E-mail: [marissa.gerards@maastrichtuniversity.nl](mailto:marissa.gerards@maastrichtuniversity.nl)

**Word count: 5061**



## ABSTRACT

### Introduction

Perturbation-based balance training (PBT) is reported to effectively reduce falls in older adults, and may even be superior compared to various exercise programs. Due to the nature of the intervention, requiring unpredictable balance perturbations, the question arises whether acceptability is an issue in PBT.

**Objective** To evaluate the acceptability of PBT in older adults with a recent history of falls.

### Design, method, participants and setting

Qualitative study in which semi-structured interviews were conducted in 16 older adults (14 females and 2 males, mean age  $73.6 \pm 6.0$  years) who completed a three-session PBT protocol as part of another study in a university medical centre in The Netherlands. Typical case and purposive sampling strategies were applied. Interviews were based on the theoretical framework of acceptability (TFA) alongside context-specific factors and analysed using a template analysis approach.

### Results

The results indicate that this PBT protocol is perceived as acceptable by older adults with a recent history of falls, and highlight key areas for potential future modifications. Enjoyment of the novel training and technology, being able to feel safe during training and perceived impact of increased self-efficacy and balance confidence were identified as facilitating factors. Potential issues included initial apprehension or anxiety during training and perceived impact being predominantly psychological instead of physical. Complimentary to the TFA one additional theme emerged, which described challenges regarding the training setting such as preference for group training in some participants and travel to the training location.

### Conclusions

The results suggest that PBT is perceived acceptable by older adults with a history of falls. Increasing the social aspect of training and sharing experiences of peers may be considered to enhance acceptability to new participants who initially feel apprehensive or anxious about their ability to participate in future implementation of PBT.

### STRENGTHS AND LIMITATIONS OF THIS STUDY

- This is the first study to use the theoretical framework of acceptability (TFA) to explore older adults' perceived acceptability of PBT.
- Using the TFA enabled a systematic approach to define and assess intervention acceptability.
- Triangulation was applied in data collection as well as data analysis to increase trustworthiness of the research findings.
- The PBT intervention was applied in a research setting, meaning that some specific factors, such as willingness to pay for participation in the intervention, were not evaluated.
- The results only reflect the perceived retrospective acceptability of the PBT, and may not entirely reflect how participant's views changed over time.

## INTRODUCTION

Falls in community-dwelling older adults can be effectively reduced through exercise interventions including balance training,[1]. However, the search for the optimal balance training program for falls prevention is still ongoing. With conventional balance training, a relatively high number of training sessions are needed, discontinuation rates are high and retention of training effects is hard to accomplish,[2, 3]. Moreover, conventional balance training seems not sufficiently task-specific to prevent falls due to slips or trips during walking, which cause up to 60% of falls in community-dwelling older adults,[4, 5]. It is not likely that conventional balance training, mostly targeting volitional movements, will improve the change-in-support reactions (e.g. taking a quick step) needed to prevent a slip or a trip, due to the additional speed and stability requirements of these balance reactions,[6]. Therefore, an increasing interest has arisen in more task-specific balance training interventions, such as perturbation-based balance training (PBT).

PBT aims to improve rapid balance reactions after unexpected external perturbations. During PBT, participants are repeatedly exposed to destabilizing perturbations while performing activities of daily living in a safe and controlled environment. A systematic review by Mansfield et al. indicated that PBT may be more effective in reducing daily-life falls in older adults, compared to various interventions ranging from no exercise to individualized physical therapy (risk ratio 0.71, 95% CI=0.52,0.96; P=.02),[7]. With PBT, balance adaptation may occur faster, potentially achieving equal or better results with fewer training sessions compared to conventional balance training,[8].

However promising, even effective interventions are likely to fail if they are not acceptable to the target population. The more acceptable the intervention, the more likely that adherence will be high,[9]. In turn, higher adherence (>80%) may result in larger effects,[10]. Due to the nature of the intervention, the question arises whether acceptability is an issue in PBT. In 2019, Okubo et al found in a pilot study of 10 healthy older adults that self-reported anxiety levels before a training session increased significantly with increasing unpredictability of PBT,[11]. Unpredictable perturbations are required in PBT to maximize learning of reactive balance control, yet these perturbations may cause anxiety and consequentially decrease acceptability.

So far limited evidence exists about the acceptability of PBT. Previous studies reported high training adherence rates, and no significant differences in drop-out rates between PBT and control groups receiving exercise or flexibility training,[12-14]. However, while quantitative data such as adherence rates may be indirect indicators of acceptability, the full-fledged concept of acceptability is a subjective evaluation made by individuals who experience an intervention,[9]. In 2017, Sekhon et al., proposed the Theoretical Framework of Acceptability (TFA) in which acceptability is viewed as a multifaceted construct, consisting of seven components,[9].

To our knowledge, no studies thus far have focused on qualitative aspects of acceptability of PBT in older adults. The aim of this study is to explore acceptability of PBT as perceived by older adults with a recent history of falls. Their views on the components constituting acceptability will be explored. The findings will enable optimisation of future implementation of PBT in clinical practice.

## METHODS

### Study design

A qualitative study consisting of semi-structured interviews was conducted. All participants provided written informed consent. This study was approved by the Medical Ethics Committee of MUMC+ (Maastricht University Medical Center) and Maastricht University (METC NL67131.068.18). The study is reported in line with the COREQ statement,[15].

### Context, study participants and sampling

Older adults who participated in PBT as part of a RCT were included,[16]. Community-dwelling older adults (age  $\geq 65$  years) who visited the hospital's outpatient clinic due to a fall incident were informed about the study, and approached by telephone a 3-7 days later. Participants were included in the RCT if they were able to walk for 15 minutes without a walking aid. Exclusion criteria included any risk factors to them participating in PBT (e.g. diagnosed osteoporosis, severe cardiopulmonary disease), or inability to communicate in Dutch. Participants were eligible for the qualitative interviews after they had completed the PBT. They were selected by the PBT trainers through a combination of typical case and purposive sampling, to select those participants who were representative of the study population and were expected to provide the most detailed input.

The PBT protocol consisted of three 30-minute sessions, during which participants were exposed to sudden balance perturbations while they stood and walked on a dual-belt treadmill embedded in a moveable platform (Computer Assisted Rehabilitation Environment (CAREN), Motek Medical BV). During the training, virtual environments were projected on a 180° screen in front of the platform. Each session consisted of three standardized conditions, while progression of difficulty levels in each condition was individualized.

1. Gait adaptability: participants walked on the treadmill while a virtual environment of a forest road, with various slopes and turns, was projected onto the screen. The platform moved correspondingly.
2. Static reactive balance: participants stood on the platform while the platform and treadmill made sudden, variable and unpredictable movements to perturb balance.
3. Dynamic reactive balance: this training condition was similar to the one above, only the perturbations were applied while the participant was walking on the treadmill.

A detailed description of the PBT protocol is published elsewhere,[16]. For an impression of the PBT setting, see Figure 1.

### Insert Figure 1

*Figure 1: Picture of a participant during PBT. Picture published with participant's permission.*

### Theoretical framework

The interviews were based on the TFA as proposed by Sekhon et al.,[9]. In this framework, acceptability is defined as a multi-faceted, seven component construct, including: affective attitude, burden, ethicality, intervention coherence, opportunity costs, perceived effectiveness and self-efficacy. *Table 1* provides an overview of our operationalisation of each construct and an example of a related

question from our interview guide (supplemental file 1). Questions regarding context-specific barriers and facilitators (e.g. training location, supervision during training) to participate in PBT were added to gain insight in their influence on PBT acceptability.

**Table 1: Theoretical framework of acceptability themes and interpretation.**

| THEME                          | INTERPRETATION                                                                                                                                                                                                             |
|--------------------------------|----------------------------------------------------------------------------------------------------------------------------------------------------------------------------------------------------------------------------|
| <b>AFFECTIVE ATTITUDE</b>      | How an individual feels about the PBT<br><i>How do you feel about the training? What made you feel this way?</i>                                                                                                           |
| <b>SELF-EFFICACY</b>           | The participant's confidence in their ability to perform the PBT<br><i>How did you do in the training?</i>                                                                                                                 |
| <b>PERCEIVED EFFECTIVENESS</b> | The extent to which the participant perceives the PBT to potentially and actually (observed) be effective<br><i>To what extent did you experience effects from the training?</i>                                           |
| <b>ETHICALITY</b>              | The extent to which the intervention had good fit with an individual's value system and expectations of a falls prevention intervention<br><i>To what extent did the training fit with your views on falls prevention?</i> |
| <b>INTERVENTION COHERENCE</b>  | The extent to which the participant understands the aim of PBT and how it works<br><i>In your own words, what was the aim of the training?</i>                                                                             |
| <b>BURDEN</b>                  | The perceived amount of effort that was required to participate in the PBT<br><i>To what extent did you find the training strenuous? To what extent did you find the training challenging?</i>                             |
| <b>OPPORTUNITY COSTS</b>       | The extent to which benefits, profits or values were given up to participate in the PBT<br><i>To what extent did you forego other opportunities to participate in the training?</i>                                        |

PBT; perturbation-based balance training

### Interview procedure

The interviews took place at the hospital, within one to three weeks after training completion, between February 2020 and May 2021. Interviews and analysis were completed before results on the effectiveness of the PBT protocol were analysed. The first 13 interviews (of in total 16) were led by a researcher (MG) who was involved in the PBT program, because she was familiar with the specifics of the training and could ask targeted follow-up questions. A second researcher was always present at the interviews as an observer, to help keep track of the interview guide, and take field notes. A verbal summary was given at the end of each interview and a written summary was sent to each participant for a member check. Interviews were conducted iteratively; the interview guide was adjusted after the first 3 interviews to include emerging themes. This process was repeated after 10 and 13 interviews were completed. All interviews were recorded using a digital voicerecorder and transcribed verbatim. Any names and other possible identification information were removed from the transcripts. As the interviews and transcripts were in Dutch, all quotes presented were translated with care to conserve the original meaning.

### Analysis

Interview transcripts were analysed using a template analysis approach,[17, 18]. The a priori template was formed based on the TFA and interview guide. Two researchers (MG and JS) independently coded

the first three interviews, using NVivo 12,[19]. After coding, they discussed the codes until consensus and formed an initial template. This process was repeated for the next three interviews. Consensus was then reached that this third template version covered the transcripts that were analysed so far. MG subsequently coded the remaining interviews using the third template version. MG and JS discussed if any changes needed to be made to the template based on the later interviews. After the 9<sup>th</sup> interview was coded, no more changes to the template were indicated. This was confirmed by coding the remaining 4 interviews, and coding saturation was reached,[20].

### Reflexivity and triangulation

As MG was involved in the PBT for these participants, as well as sampling and interviewing, it was possible that there was researcher bias or that participants were more inclined to give desirable answers. For the purpose of interviewer triangulation, three additional interviews (interviews 14-16) were conducted by an independent researcher (AW) to confirm or reject previous responses. Coding of these three interviews revealed no new codes, which can be interpreted as secondary confirmation of the coding template and saturation. Participants did not give different answers to different interviewers. JS and AW were not involved in the RCT on PBT and represented an outsider perspective in the design and review of the interview guide, coding and analysis, therewith contributing to further researcher triangulation. Through comparison and discussion of the transcripts, the authors then reached consensus on the most important themes from the interviews.

### Patient and public involvement

Patients were first involved in pilot testing of the PBT protocol in this research, and the training protocol was fine-tuned based on their feedback. The aim of this study is to explore participant's perceptions and views on the acceptability of the training, which may be used to guide design or implementation of future PBT interventions.

## RESULTS

### Participant description

Sixteen participants (14 females and 2 males, mean age  $73.6 \pm 6.0$  years) were approached, all of which accepted. For comparison, the RCT included a total of 82 participants, of which 39 were randomized to the PBT group (median age 73 years (IQR 10 years), 31 females and 8 males). Table 2 provides an overview of participants and characteristics. Nine interviews were conducted at the hospital, seven were telephone interviews due to restrictions related to the COVID-19 pandemic. Interviews lasted 15-35 minutes. One participant (P031) missed one training session due to COVID-19 restrictions. Training adherence was 93,7% for the full PBT group, and 98,3% for participants included in this qualitative study.

**Table 2: Overview of participant and interview characteristics.**

| Participant | Sex (F/M) | Age (years) | Falls previous year (n) | Interview type | Interviewer |
|-------------|-----------|-------------|-------------------------|----------------|-------------|
| P022        | F         | 79          | 1                       | Face-to-face   | MG          |
| P023        | F         | 80          | 1                       | Face-to-face   | MG          |
| P026        | M         | 65          | 1                       | Telephone      | MG          |
| P027        | F         | 76          | 2                       | Face-to-face   | MG          |
| P030        | F         | 83          | 1                       | Telephone      | MG          |
| P031        | M         | 67          | 1                       | Telephone      | MG          |
| P032        | F         | 79          | 1                       | Telephone      | MG          |
| P040        | F         | 73          | 2                       | Face-to-face   | MG          |

|      |   |    |   |              |    |
|------|---|----|---|--------------|----|
| P042 | F | 65 | 2 | Face-to-face | MG |
| P043 | F | 74 | 1 | Face-to-face | MG |
| P044 | F | 79 | 4 | Face-to-face | MG |
| P045 | F | 74 | 1 | Face-to-face | MG |
| P050 | F | 79 | 1 | Face-to-face | MG |
| P068 | F | 70 | 1 | Telephone    | AW |
| P069 | F | 66 | 3 | Telephone    | AW |
| P082 | F | 69 | 1 | Telephone    | AW |

*F = female, M = male.*

### Perceptions of acceptability

The findings are presented below for each of the TFA components, along with illustrative quotes from participants. The theme 'training setting' was added, this theme includes context-specific barriers and facilitators that were described by the participants.

### Affective attitude

Overall, participants described that they felt the PBT was an enjoyable experience. Most participants positively related this to the novelty of the experience, reporting feelings of curiosity and excitement. In contrast, some participants related this novelty to a feeling of suspense, and sometimes feeling unsure about their ability to participate in PBT at the start of the first training session. Most often this was described as a good amount of suspense and curiosity about what would happen, and not perceived as a barrier.

P044 *"I didn't know what I could expect. But I said: Guys, I'll just see what happens, I'll leave it up to you. (...) In the beginning, you don't know what is going to happen to you. You feel a little insecure. But I was glad that I did it."*

One participant described feeling anxious during the first training session, a feeling that fortunately decreased throughout the following sessions.

P030 *"Now you know what you have to do so it's different. But at first it's kind of a startle response I think."*

All participants reported that feeling safe and able to challenge themselves without fear of falling was closely related to a positive experience. The safety equipment (especially the safety harness), feeling heard by the trainer and receiving information during the training session were identified as important facilitators.

P050 *"And again, (laughing) I was very happy that I didn't need to hang from those ropes [safety harness], but I had complete faith that if anything were to happen I definitely would not fall. So that didn't cause any anxiety for me."*

### Self-efficacy

All participants described that they were able to participate in the training sessions, and that they felt they did well. Some participants reported that their sense of self-efficacy grew throughout the training sessions, starting with feeling unsure about their ability at the first training session, to feeling accomplished after the second or third session. Some of these participants related their initial apprehension to comorbidities.

P031 *"I have COPD and you're aware that there are situations in which you may have to drop out. And in that sense, this could have happened to me in this training as well. Fortunately, it didn't."*

Finally, one participant provided an example of how she felt after the training sessions.

1  
2  
3 P022 *“Well, I can say that I feel I did well. It brings you joy if you have something like that (decreased*  
4 *strength in one leg due to a comorbidity) and you’re still able to catch yourself well.”*

### 6 **Perceived effectiveness**

7 This construct is understood as the extent to which participants perceived changes in their physical  
8 or psychological functioning, and attributed this to the training. Perceived training effects can be  
9 divided into physical and psychological effects. For most participants, recognizing physical training  
10 effects was not straightforward. Some participants clearly described improvements in their daily  
11 activities which they attributed to the training, such as improved walking ability or balance.

12  
13  
14 P068. *“I’ve been walking my son’s dog a lot lately. (...) I’ve noticed that because of that (training) I’m*  
15 *steadier on my legs. Like this morning when I walked him, I had to walk downhill. And before I did the*  
16 *balance training, I would have thought ‘Oh I have to be careful’, but now I just know: I have to move*  
17 *like this, I have to put my foot here. And I can do this.”*

18  
19 Still, most participants expressed that their physical abilities had remained the same, and wondered  
20 how they could have noticed possible changes due to training. For most, falling or stumbling was not  
21 a daily occurrence to begin with, and as the interviews took place shortly after training completion,  
22 they noted that potential changes were not easily identifiable in this short term. This was neither  
23 described as a barrier nor a facilitator to participating in the PBT.

24  
25  
26 P031. *“But if my balance has improved because of it, that’s very hard to determine, because I don’t fall*  
27 *very often. That I broke my wrist due to a fall was more of an accident.”*

28  
29 Psychological effects were described as much more apparent and positively related to the acceptability  
30 of the intervention. Most participants expressed that the training had helped them gain confidence  
31 and improved self-efficacy, during the training sessions and in everyday life. They attributed this to  
32 how during the training they experienced that their body was capable of more than they expected.

33  
34 P068. *“Especially the first time I noticed that I was quite insecure. (...) And that was more related to my*  
35 *confidence, which had been damaged. And I noticed after a few times that I, because of the training*  
36 *actually, gained some confidence. That I got more confident in my body.”*

### 38 **Ethicality**

39 This construct may not only be related to the extent to which the PBT was perceived to be a good fit  
40 with the participant’s value system, but also to their expectations of the PBT. Most participants  
41 reported that anything they could do to prevent future fall incidents was viewed as valuable.

42  
43  
44 P069 *“Well, I was really glad about it, because I thought ‘anything I can practice or do to help me fall*  
45 *less, will be helpful’ ”*

46  
47 Some participants found it hard to describe if falls prevention in general fit within their value system.  
48 Often participants related this to not having heard or thought about falls prevention until they were  
49 approached by the study team.

50  
51 P032 *“I hadn’t heard or read anything about it before, I started this without expectations.”*

52  
53 Some also described having thought about it but not knowing who to approach about the topic, or not  
54 considering that they needed it. The lack of prior knowledge or expectations about the PBT was not  
55 perceived as a barrier to participating. Conclusively, some participants valued being able to contribute  
56 to a scientific study.

### Intervention Coherence

All participants were able to recognize and describe the aim of the intervention to a certain degree. For example:

P023 *"In my own words? That you're more able to keep your balance. And it has worked."*

Another participant provided a more detailed explanation of what she perceived as the aim of the intervention.

P043 *"To be able to recover, when you've lost balance. I think that that was the aim. That you're able to react; your body, your legs, or even with the help of an arm swing. Faster recovery to regain your balance."*

A factor that repeatedly emerged related to coherence of the intervention, is 'intervention validity'; understood as the extent to which participants perceived that the intervention had a good fit with its' aims. Most participants who discussed this topic, described the intervention as valid and perceived this as a facilitator to participating in PBT.

P026 *"A few times I nearly fell, but then you're able to correct this and it's a beautiful simulation of what can happen in real life. Especially when the treadmill belts don't run at the same speed, when one decelerates while the other continues. Then you get an effect like you're experiencing a slip."*

However, a few participants also questioned if it was at all possible to prevent a future fall incident, reasoning that a fall occurs too sudden to make any preventive adjustments.

### Burden

Participants agreed that the burden of participating in PBT was acceptable. The training was perceived as challenging, but not too challenging. Some participants positively related this to the way the training sessions were structured, providing a gradual and personalized increase in challenge.

P069 *"No, there was a good and gradual increase in challenge. They started the training quite easy and then it gradually became harder. It was very well structured."*

Most effort was required to maintain or regain balance, and to stay focused throughout the session. Participants reported that the required physical stamina was not an important contributing factor to the perceived training load. When mentioned, participants described that the unexpected balance perturbations were perceived as more challenging than the first part of the training, where they could anticipate on what would happen next.

P022 *"The hard part was when it was sudden, unexpected. Going left, right, forward. That was, well, not hard; you can get it done, but you have to make sure you don't fall, even if you're in a safety harness."*

### Opportunity costs

Participants agreed that no activities had to be given up to participate in the PBT. Most related this to having enough time after retirement. The possibility to schedule the training sessions in consultation with the trainer instead of having fixed training times was reported as an important facilitator. Most participants accepted travelling to the training location as a fact and did not describe this as either a barrier or a facilitator. A few participants found the central location of the hospital a positive factor, as this was easy to reach using public transportation. Another few participants described that any location outside walking distance provided a challenge and a potential barrier, as they were no longer able to drive a car and had to rely on public transportation or family members to get there. As for the training location being inside a university hospital, this was mostly perceived as an advantage. Participants often described that they thought this was the logical place where they expected to find



1  
2  
3 the right equipment and expertise for this kind of training. Some also mentioned that they regarded  
4 the university hospital as a familiar institute, and therefore easy to find.  
5

### 6 **Training setting**

7 This additional theme was identified throughout the interviews, and includes specific factors related  
8 to the setting of the PBT. The PBT took place in a specific setting with specialized technological  
9 equipment (see *Figure 1*) inside a university hospital. Most participants described that they  
10 experienced the technological training equipment as positive, as a surprising and interesting novelty.  
11 One participant explained that she felt slightly overwhelmed when she first saw the training  
12 equipment, but this improved when she got a more detailed explanation of what was going to  
13 happen and when she experienced the training for herself.  
14  
15

16 P031. *“The setting was very surprising. The fact that you’re walking on a treadmill in an environment  
17 that moves with you. I thought it was a very extraordinary experience.”*  
18

19 Most participants described the virtual environments that were used during training as surprising and  
20 positive. A few participants expressed a preference for the first virtual environment (the forest road),  
21 describing that this felt more friendly and stimulating than the second, more industrial environment.  
22

23 The individual nature of this training was clearly valued by some participants, while others were  
24 ambivalent about this. Participants who indicated a preference for training individually, described that  
25 they enjoyed being able to really focus on the training itself without distractions from other people or  
26 the environment, and to train at their own level. Some also reasoned that this increased the potential  
27 of the training to be effective.  
28

29 P068. *“This, the balance training, is not something you can do in a group. And I just thought it was very  
30 pleasant, because you’re focusing on yourself. You’re focused on what is going to happen, and you can  
31 feel everything that happens (...). And I just think that it is much more pleasant this way, and it will be  
32 more helpful.”*  
33  
34

35 While most participants preferred training individually, some described that they were curious to see  
36 how other people performed during the training sessions. Additionally, two participants would have  
37 appreciated the opportunity to compare and discuss fall-related experiences with peers.  
38

39 A numeric rating scale (NRS) was used as a tool to individualize training progression. During the training  
40 sessions, participants were regularly asked to score how challenged they felt at that moment, ranging  
41 from 0 (not challenged at all) to 10 (highest perceivable challenge). Participants described mixed  
42 experiences with this system. Some found the scoring easy and even helpful and described that it  
43 helped them gain insight in how they felt at that moment. Others described that they had trouble  
44 translating their subjective experience to a number that meant little to them. Overall, the NRS scoring  
45 was not perceived as an important barrier or facilitator.  
46  
47

### 48 **DISCUSSION**

49 The aim of this study was to evaluate the acceptability of a PBT program as perceived by older adults,  
50 using the TFA. Gaining understanding of the acceptability of PBT in older adults with a recent history  
51 of falls is imperative to enable and optimize future implementation of PBT in clinical practice.  
52

53 The results indicate that this PBT protocol is perceived as acceptable by older adults with a recent  
54 history of falls and highlight key areas for potential future modifications. Besides the TFA, one  
55 additional theme emerged from the data, which includes challenges specific to the training setting  
56 such as preference for group training in some participants and travel to the training location.  
57  
58  
59  
60

1  
2  
3 Participants valued being able to feel safe during training. Most reported that this was accomplished  
4 by using the safety harness, the physical presence and guidance from the trainer, and individualized  
5 training progression. These results reflect those of Miller et al., who evaluated the perceived  
6 acceptability of conceptually challenging exercise training to older adults, including dynamic balance  
7 tasks with external perturbations,[21]. The novelty of the training and technology were regarded as a  
8 positive factor contributing to enjoyment by most participants. However, as in Miller's study, some  
9 participants reported feeling initially apprehensive or anxious towards the new training. Okubo et  
10 al.,[11], related elevated anxiety levels during PBT to the unpredictability of the perturbations. We  
11 previously hypothesized that a more gradual training progression over multiple sessions may help  
12 participants build confidence and alleviate anxiety while still being effective,[22]. This hypothesis is  
13 partially confirmed by our current findings, which indicated that self-efficacy improved over time.  
14 Participants who initially experienced anxiety also reported that this improved over time, and  
15 individualized training progression was reported as a facilitator to feeling safe during training. As  
16 unexpected perturbations are key for task-specific PBT, the trade-off between measures to alleviate  
17 anxiety while still achieving the desired training stimulus should be considered in future  
18 implementation. Our findings suggest that this may be particularly important at the start of training.  
19  
20  
21

22 Perceived psychological effects in the form of increased confidence in balance abilities, and increased  
23 self-efficacy in daily life were often reported. Consistent with previous studies on falls prevention  
24 interventions, participants described that the PBT helped them gain insight in their ability level and  
25 were pleasantly surprised by their ability,[21, 23]. This is important as maintaining balance confidence  
26 can help avoid undue activity avoidance and subsequent disability,[24]. Moreover, decreased balance  
27 confidence has been identified as a predictor for future falls,[25]. While participants generally felt they  
28 did well during training, perceived physical effects in daily life were less apparent. Participants  
29 questioned how they would notice physical training effects, as falling was not a daily occurrence for  
30 them to begin with. In part, this may have been related to the interviews taking place shortly after  
31 training completion, leaving little time for participants to experience training effects. However, we  
32 hypothesize that this may also be related to the perceived intervention validity and ethicality.  
33  
34  
35

36 While the topic of perceived intervention validity emerged in most of the interviews, participants views  
37 were mixed. Some described that they perceived the intervention valid as it clearly simulated daily-life  
38 balance perturbations. In contrast, other participants did not discuss PBT specifically, rather  
39 questioned if it was at all possible to prevent a fall in daily life, describing that falls occurred too sudden  
40 to intervene or were 'just accidents that could happen to anybody'. The belief that falls are just bad  
41 luck, and disbelief that they are preventable is well-known from the literature,[26-29]. A review by  
42 McInnes et al. recommended that these beliefs should be countered prior to intervention,[30]. While  
43 all participants in our study had recently fallen and agreed to participate in the current intervention,  
44 none of them actively sought to participate in falls prevention before. Participants described that they  
45 had previously given little or no thought to falls prevention, or that they did not think they needed it.  
46 This is in line with previous studies, indicating that those who have previously fallen are not necessarily  
47 more likely to be receptive to falls prevention interventions,[31, 32]. Another study described that  
48 older adults may reject the idea that they need falls prevention because they regard themselves as  
49 healthy and able to manage,[33]. PBT being a relatively new intervention, it may be assumed that this  
50 intervention is even less known to potential participants, thus increasing the challenge to reach the  
51 target population. Some participants reported that being informed by or talking to a health practitioner  
52 about the PBT, and being approached by the researchers, prompted them to consider falls prevention  
53 or to finally participate. This corroborates findings from Yardley et al., reporting that a personal  
54 invitation by a health practitioner may be a facilitating factor to participation in falls prevention,[34].  
55 Our findings suggest that these factors may be particularly important to consider for PBT or any  
56 relatively unknown intervention, to effectively reach older adults.  
57  
58  
59  
60

1  
2  
3 Some participants clearly expressed a preference for training individually. Others described that they  
4 would have been curious to see how others performed during the training sessions, or to share fall-  
5 related experiences with others. Promoting the social value of falls prevention interventions has been  
6 previously identified as a facilitator,[30]. Additionally, watching or partnering with a peer completing  
7 the same exercises may facilitate participation and improve older adults' confidence for their own  
8 attempt,[21, 35, 36]. As PBT is currently not suited for a group intervention, it may be considered to  
9 provide a medium between individual and group training, while simultaneously addressing the initial  
10 apprehension or anxiety experienced by some participants. Specifically, this could be achieved by  
11 providing new participants with a video of a peer completing the exercises before their own  
12 participation, or combining training sessions of two participants where they can see each other  
13 perform and share experiences. Conclusively, hearing experiences from peers who completed the PBT  
14 might also improve perceived intervention validity and ethicality for future participants.  
15  
16

17  
18 Finally, a practical factor that should be considered is travelling to the training location. As is the case  
19 with most set-ups for PBT, the equipment used in this program is not yet available in many locations.  
20 Some participants described that while they were able to attend the PBT sessions, travel was a  
21 potential barrier. This barrier is well-known in this population, as some older adults are no longer able  
22 to drive a car themselves and thus depend on family members or public transportation,[34, 37].  
23

### 24 **Strengths and Limitations**

25  
26 To our knowledge, this is the first study to use the TFA to examine older adults' perceived acceptability  
27 of PBT. Using the TFA enabled a systematic approach to define and assess intervention  
28 acceptability,[9]. While triangulation was applied in data collection as well as data analysis to increase  
29 trustworthiness of the research findings, it should be noted that one researcher (MG) was involved in  
30 the PBT sessions, as well as most of the interviews. In future studies, it may be considered to include  
31 a dedicated interviewer separate to the intervention team. A few limitations should be considered  
32 when interpreting the results of our study. First, the PBT intervention was applied in a research setting,  
33 meaning that some specific factors, such as willingness to pay for participation in the intervention,  
34 were not evaluated. Second, the results only reflect the perceived retrospective acceptability of the  
35 PBT. Further research is necessary to evaluate prospective and concurrent acceptability, to further  
36 elucidate what factors motivate or prevent older adults from participating in PBT,[9].  
37  
38

39  
40 A final consideration is that due to COVID-19 related restrictions, 7 out of the 16 interviews in this  
41 study were telephone interviews. While face-to-face interviews are often regarded as the gold  
42 standard, there is little evidence that quality of findings collected through telephone interviews is  
43 compromised,[38]. Consistent with Sturges et al., we identified no clear differences between data  
44 collected through face-to-face interviews compared to telephone interviews in our study,[39].  
45

### 46 **CONCLUSIONS**

47  
48 In conclusion, findings from this study indicate that a technology-assisted PBT program is acceptable  
49 to older adults with a recent falls history. Enjoyment of the intervention, being able to feel safe,  
50 perceived psychological effectiveness and individualized training progression were identified as  
51 important factors contributing to the perceived acceptability. Increasing the social aspect of training  
52 and sharing experiences of peers may be considered to enhance acceptability to new participants who  
53 initially feel apprehensive or anxious about their ability to participate, or who are unsure what to  
54 expect. Raising awareness of the importance and possibilities of falls prevention training in general is  
55 a challenge in this population.  
56  
57

### 58 **Acknowledgements**

59  
60 We thank Anouk Weemaes for her contribution in conducting the interviews in this study.

### Ethics statement

All participants provided written informed consent. This study was approved by the Medical Ethics Committee of MUMC+ (Maastricht University Medical Center) and Maastricht University (METC NL67131.068.18).

### Competing interest

The authors declare no competing interests.

### Funding

This research received no specific grant from any funding agency in the public, commercial or not-for-profit sectors.

### Contributorship statement

Marissa Gerards: Conceptualization, Methodology, Validation, Formal Analysis, Investigation, Data Curation, Writing – Original Draft, Visualization, Project Administration. Judith Sieben: Methodology, Validation, Formal Analysis, Data Curation, Writing – Review & Editing. Rik Marcellis: Conceptualization, Writing – Review & Editing. Rob de Bie: Conceptualization, Writing – Review & Editing, Supervision. Kenneth Meijer: Conceptualization, Writing – Review & Editing, Supervision. Antoine Lenssen: Conceptualization, Writing – Review & Editing, Supervision, Project Administration.

### Data availability

No additional data available.

### REFERENCES

- 1 Sherrington C, Fairhall NJ, Wallbank GK, et al. Exercise for preventing falls in older people living in the community. *Cochrane Database Syst Rev* 2019;1. doi: 10.1002/14651858.CD012424.pub2
- 2 Rieger MM, Papegaaij S, Steenbrink F, et al. Perturbation-based gait training to improve daily life gait stability in older adults at risk of falling: protocol for the REACT randomized controlled trial. *BMC Geriatr* 2020;20(1):167. doi: 10.1186/s12877-020-01566-z
- 3 Bunn F, Dickinson A, Barnett-Page E, et al. A systematic review of older people's perceptions of facilitators and barriers to participation in falls-prevention interventions. *Ageing Soc* 2008;28(4):449-72. doi:10.1017/S0144686X07006861
- 4 Berg WP, Alessio HM, Mills EM, et al. Circumstances and consequences of falls in independent community-dwelling older adults. *Age Ageing* 1997;26(4):261-8. doi: 10.1093/ageing/26.4.261
- 5 Talbot LA MR, Witham EK, Metter EJ. Falls in young, middle-aged and older community dwelling adults: perceived cause, environmental factors and injury. *BMC Public Health* 2005;5. doi: 10.1186/1471-2458-5-86
- 6 Maki BE, McIlroy WE. Change-in-support balance reactions in older persons: an emerging research area of clinical importance. *Neurol Clin* 2005;23(3):751-83. doi: 10.1016/j.ncl.2005.01.002
- 7 Mansfield A, Wong JS, Bryce J, et al. Does perturbation-based balance training prevent falls? Systematic review and meta-analysis of preliminary randomized controlled trials. *Phys Ther* 2015;95(5):700-9. doi: 10.2522/ptj.20140090

- 1  
2  
3 8 Pai YC, Bhatt T, Yang F, et al. Perturbation training can reduce community-dwelling older adults'  
4 annual fall risk: a randomized controlled trial. *J Gerontol A Biol Sci Med Sci* 2014;69(12):1586-94. doi:  
5 10.1093/gerona/glu087  
6
- 7 9 Sekhon M, Cartwright M, Francis JJ. Acceptability of healthcare interventions: an overview of reviews  
8 and development of a theoretical framework. *BMC Health Serv Res* 2017;17(1):88. doi:  
9 10.1186/s12913-017-2031-8  
10
- 11 10 Osho O, Owoeye O, Armijo-Olivo S. Adherence and Attrition in Fall Prevention Exercise Programs  
12 for Community-Dwelling Older Adults: A Systematic Review and Meta-Analysis. *J Aging Phys Act*  
13 2018;26(2):304-26. doi: 10.1123/japa.2016-0326  
14
- 15 11 Okubo Y, Brodie MA, Sturnieks DL, et al. A pilot study of reactive balance training using trips and  
16 slips with increasing unpredictability in young and older adults: Biomechanical mechanisms, falls and  
17 clinical feasibility. *Clin Biomech (Bristol, Avon)* 2019;67:171-9. doi: 10.1016/j.clinbiomech.2019.05.016  
18  
19
- 20 12 Kurz I, Gimmon Y, Shapiro A, et al. Unexpected perturbations training improves balance control and  
21 voluntary stepping times in older adults - a double blind randomized control trial. *BMC geriatr*  
22 2016;16:58. doi: 10.1186/s12877-016-0223-4  
23
- 24 13 Lurie JD, Zagaria AB, Pidgeon DM, et al. Pilot comparative effectiveness study of surface  
25 perturbation treadmill training to prevent falls in older adults. *BMC Geriatr* 2013;13:49. doi:  
26 10.1186/1471-2318-13-49  
27
- 28 14 Mansfield A, Peters AL, Liu BA, et al. Effect of a perturbation-based balance training program on  
29 compensatory stepping and grasping reactions in older adults: a randomized controlled trial. *Phys Ther*  
30 2010;90(4):476-91. doi: 10.2522/ptj.20090070  
31
- 32 15 Tong A, Sainsbury P, Craig J. Consolidated criteria for reporting qualitative research (COREQ): a 32-  
33 item checklist for interviews and focus groups. *Int J Qual Health Care* 2007;19(6):349-57. doi:  
34 10.1093/intqhc/mzm042  
35
- 36 16 Gerards MHG, Marcellis RGJ, Poeze M, et al. Perturbation-based balance training to improve  
37 balance control and reduce falls in older adults – study protocol for a randomized controlled trial. *BMC*  
38 *Geriatr* 2021;21(1):9. doi: 10.1186/s12877-020-01944-7  
39
- 40 17 Brooks J, McCluskey S, Turley E, et al. The Utility of Template Analysis in Qualitative Psychology  
41 Research. *Qual Res Psychol* 2015;12(2):202-22. doi: 10.1080/14780887.2014.955224  
42
- 43 18 King N. Template analysis. *Qualitative methods and analysis in organizational research: A practical*  
44 *guide*. Thousand Oaks, CA: Sage Publications Ltd 1998:118-34.  
45
- 46 19 QSR International Pty Ltd. NVivo qualitative data analysis software, version 12 2018.  
47
- 48 20 Saunders B, Sim J, Kingstone T, et al. Saturation in qualitative research: exploring its  
49 conceptualization and operationalization. *Qual Quant* 2018;52(4):1893-907. doi: 10.1007/s11135-017-  
50 0574-8  
51
- 52 21 Miller CT, Teychenne M, Maple J-L. The perceived feasibility and acceptability of a conceptually  
53 challenging exercise training program in older adults. *Clin Interv Aging* 2018;13:451-61. doi:  
54 10.2147/CIA.S154664  
55
- 56 22 Gerards MHG, McCrum C, Mansfield A, et al. Perturbation-based balance training for falls reduction  
57 among older adults: Current evidence and implications for clinical practice. *Geriatr Gerontol Int*  
58 2017;17(12):2294-303. doi: 10.1111/ggi.13082  
59  
60

- 1  
2  
3 23 Davis JC, Dian L, Parmar N, et al. Geriatrician-led evidence-based Falls Prevention Clinic: a  
4 prospective 12-month feasibility and acceptability cohort study among older adults. *BMJ Open*  
5 2018;8(12):e020576. doi: 10.1136/bmjopen-2017-020576  
6  
7 24 Büla CJ, Monod S, Hoskovec C, et al. Interventions aiming at balance confidence improvement in  
8 older adults: an updated review. *Gerontology* 2011;57(3):276-86. doi: 10.1159/000322241  
9  
10 25 Landers MR, Oscar S, Sasaoka J, et al. Balance Confidence and Fear of Falling Avoidance Behavior  
11 Are Most Predictive of Falling in Older Adults: Prospective Analysis. *Phys Ther* 2016;96(4):433-42. doi:  
12 10.2522/ptj.20150184  
13  
14 26 Commonwealth of Australia. Preventing Falls and Harm From Falls in Older People: Best Practice  
15 Guidelines for Australian Community Care 2009.  
16 <https://www.safetyandquality.gov.au/sites/default/files/migrated/Guidelines-COMM.pdf> Accessed  
17 19/08/2021  
18  
19 27 Claire Ballinger SP. Falling from grace or into expert hands? Alternative accounts about falling in  
20 older people. *Br J Occup Ther* 2000;63(12):573-9. doi: 10.1177/030802260006301203  
21  
22 28 Kong KS, Lee Fk FK, Mackenzie AE, et al. Psychosocial consequences of falling: the perspective of  
23 older Hong Kong Chinese who had experienced recent falls. *J Adv Nurs* 2002;37(3):234-42. doi:  
24 10.1046/j.1365-2648.2002.02094.x  
25  
26 29 Finnegan S, Bruce J, Seers K. Life after falls prevention exercise – experiences of older people taking  
27 part in a clinical trial: a phenomenological study. *BMC Geriatr* 2021;21(1):91. doi: 10.1186/s12877-021-  
28 02037-9  
29  
30 30 McInnes E, Askie L. Evidence Review on Older People's Views and Experiences of Falls Prevention  
31 Strategies. *Worldviews Evid Based Nurs* 2004;1(1):20-37. doi: 10.1111/j.1741-6787.2004.04013.x  
32  
33 31 Cumming RG, Thomas M, Szonyi G, et al. Adherence to occupational therapist recommendations  
34 for home modifications for falls prevention. *Am J Occup Ther* 2001;55(6):641-8. doi:  
35 10.5014/ajot.55.6.641  
36  
37 32 Edwards N, Lockett D, Aminzadeh F, et al. Predictors of Bath Grab-Bar Use among Community-Living  
38 Older Adults. *Can J Aging* 2003;22(2):217-27. doi:10.1017/S0714980800004530  
39  
40 33 Allen A, Simpson JM. A primary care based fall prevention programme. *Physiother Theory Pract*  
41 1999;15(2):121-33. doi: 10.1080/095939899307810  
42  
43 34 Yardley L, Donovan-Hall M, Francis K, et al. Attitudes and Beliefs That Predict Older People's  
44 Intention to Undertake Strength and Balance Training. *The Journals of Gerontology. Series B*  
45 2007;62(2):119-P25. doi: 10.1093/geronb/62.2.p119  
46  
47 35 Bethancourt HJ, Rosenberg DE, Beatty T, et al. Barriers to and facilitators of physical activity  
48 program use among older adults. *Clin Med Res* 2014;12(1-2):10-20. doi: 10.3121/cmr.2013.1171  
49  
50 36 Biedenweg K, Meischke H, Bohl A, et al. Understanding older adults' motivators and barriers to  
51 participating in organized programs supporting exercise behaviors. *J Prim Prev* 2014;35(1):1-11. doi:  
52 10.1007/s10935-013-0331-2  
53  
54 37 Kiami SR, Sky R, Goodgold S. Facilitators and barriers to enrolling in falls prevention programming  
55 among community dwelling older adults. *Arch Gerontol Geriatr* 2019;82:106-13. doi:  
56 10.1016/j.archger.2019.01.006  
57  
58  
59  
60

1  
2  
3  
4  
5  
6  
7  
8  
9  
10  
11  
12  
13  
14  
15  
16  
17  
18  
19  
20  
21  
22  
23  
24  
25  
26  
27  
28  
29  
30  
31  
32  
33  
34  
35  
36  
37  
38  
39  
40  
41  
42  
43  
44  
45  
46  
47  
48  
49  
50  
51  
52  
53  
54  
55  
56  
57  
58  
59  
60

38 Novick G. Is there a bias against telephone interviews in qualitative research? *Res Nurs Health* 2008;31(4):391-8. doi: 10.1002/nur.20259

39 Sturges JE, Hanrahan KJ. Comparing Telephone and Face-to-Face Qualitative Interviewing: a Research Note. *Qual Res* 2004;4(1):107-18. doi: 10.1177/1468794104041110

For peer review only

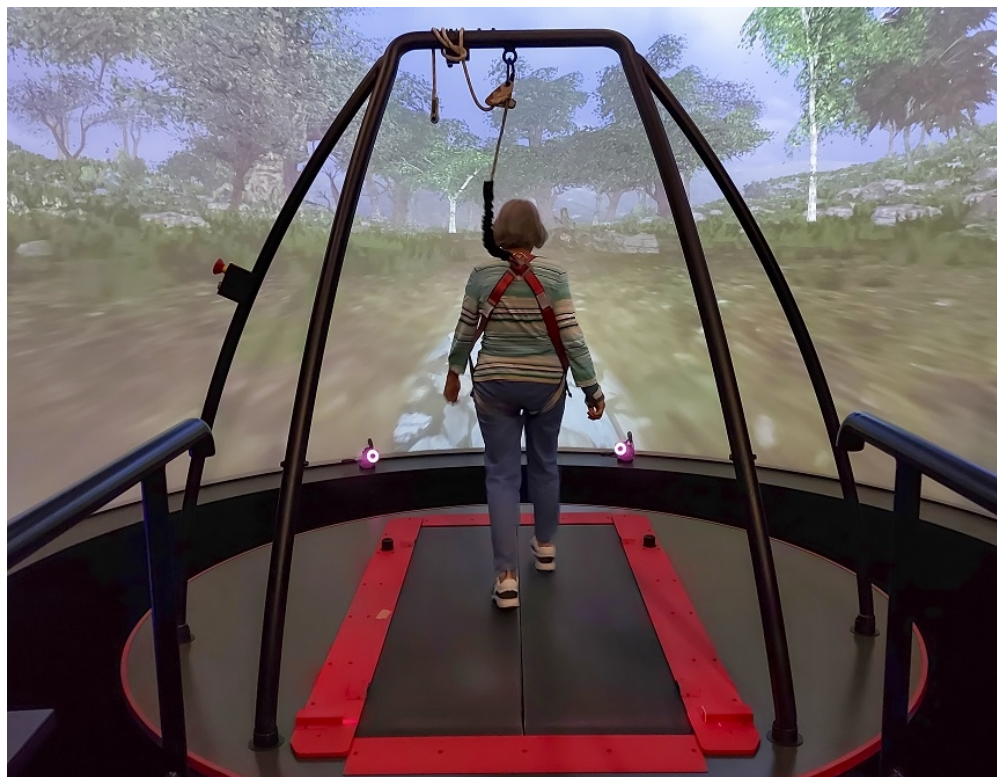

Figure 1: Picture of a participant during PBT. Picture published with participant's permission.

73x56mm (300 x 300 DPI)



## **Interview guide Acceptability of Perturbation-based balance training (PBT)**

This interview guide gives an overview of the opening questions for each topic. The interviewers used a range of follow-up questions to obtain more information which were adapted and used as appropriate in each interview.

### **Theoretical framework**

Opening question: Can you tell me how you experienced the training?

#### **Affective attitude**

How do you feel about the training?

#### **Burden**

To what extent did you find the training difficult?

To what extent did you find it challenging?

#### **Self-efficacy**

How do you feel you did during the training?

#### **Perceived effectiveness**

To what extent did you notice effects from the training (during training and in daily-life)?

#### **Ethicality**

To what extent did the training fit with your values? To what extent did it fit with your views on falls prevention?

#### **Intervention coherence**

Can you explain to me what the goal of the training was?

#### **Opportunity costs**

To what extent did you have to give up other activities or values to participate in the training?

### **Context-specific factors**

What are your thoughts about...

... the location of the training?

... training individually, as opposed to in a group?

... the technological equipment used in the training?

... the scoring system that was used during training?

... the way the training was supervised?

# Acceptability of a perturbation-based balance training program for falls prevention in older adults: a qualitative study

Marissa Gerards<sup>1,2\*</sup>, Judith Sieben<sup>2,3</sup>, Rik Marcellis<sup>1</sup>, Rob de Bie<sup>2</sup>, Kenneth Meijer<sup>4</sup>, Antoine Lenssen<sup>1</sup>

1. Department of Physical Therapy, Maastricht University Medical Center, Maastricht, The Netherlands

2. Department of Epidemiology, Care and Public Health Institute (CAPHRI), Maastricht University, Maastricht, The Netherlands

3. Department of Anatomy and Embryology, Maastricht University, Maastricht, The Netherlands

4. Department of Nutrition and Movement Sciences, School of Nutrition and Translational Research in Metabolism (NUTRIM), Maastricht University, Maastricht, The Netherlands

**Key words:** Balance, perturbation, falls prevention, older adults, accidental falls

\*Corresponding Author.

E-mail: [marissa.gerards@maastrichtuniversity.nl](mailto:marissa.gerards@maastrichtuniversity.nl)

**Word count:** 5063 4998

## ABSTRACT

### Introduction

Perturbation-based balance training (PBT) is reported to effectively reduce ~~daily-life~~ falls in older adults, and may even be superior compared to various exercise programs. Due to the nature of the intervention, requiring unpredictable balance perturbations, the question arises whether acceptability is an issue in PBT.

**Objective** ~~The aim of this study is to~~ evaluate the acceptability of PBT in older adults with a recent history of falls.

### **Design, mMethod, participants and settings**

Qualitative study in which sSemi-structured interviews were conducted in 16 older adults (14 females and 2 males, mean age 73.6 ± 6.0 years) who completed a three-session PBT protocol as part of another study in a university medical centre in The Netherlands. Typical case and purposive sampling strategies were applied. Interviews were based on the theoretical framework of acceptability (TFA) alongside context-specific factors and analysed using a template analysis approach.

### Results

~~Sixteen participants were interviewed.~~ The results indicate that this PBT protocol is perceived as acceptable by older adults with a recent history of falls, and highlight key areas for potential future modifications. Enjoyment of the novel training and technology, being able to feel safe during training and perceived impact of increased self-efficacy and balance confidence were identified as facilitating factors. Potential issues included initial apprehension or anxiety during training and perceived impact being predominantly psychological instead of physical. Complimentary to the TFA one additional theme emerged, which described challenges regarding the training setting such as preference for group training in some participants and travel to the training location.

### Conclusions

The results suggest that PBT is perceived acceptable by older adults with a history of falls. Increasing the social aspect of training and sharing experiences of peers may be considered to enhance acceptability to new participants who initially feel apprehensive or anxious about their ability to participate and indicate important factors that should be considered in future implementation of PBT.

## STRENGTHS AND LIMITATIONS OF THIS STUDY

- This is the first study to use the theoretical framework of acceptability (TFA) to explore older adults' perceived acceptability of PBT.
- Using the TFA enabled a systematic approach to define and assess intervention acceptability.
- Triangulation was applied in data collection as well as data analysis to increase trustworthiness of the research findings.
- The PBT intervention was applied in a research setting, meaning that some specific factors, such as willingness to pay for participation in the intervention, were not evaluated.
- The results only reflect the perceived retrospective acceptability of the PBT, and may not entirely reflect how participant's views changed over time.

## INTRODUCTION

Falls in community-dwelling older adults can be effectively reduced through exercise interventions including balance training,[1]. However, the search for the optimal balance training program for falls prevention is still ongoing. With conventional balance training, a relatively high number of training sessions are needed, discontinuation rates are high and retention of training effects is hard to accomplish,[2, 3]. Moreover, conventional balance training seems not sufficiently task-specific to prevent falls due to slips or trips during walking, which cause up to 60% of falls in community-dwelling older adults,[4, 5]. It is not likely that conventional balance training, mostly targeting volitional movements, will improve the change-in-support reactions (e.g. taking a quick step) needed to prevent a slip or a trip, due to the additional speed and stability requirements of these balance reactions,[6]. Therefore, an increasing interest has arisen in more task-specific balance training interventions, such as perturbation-based balance training (PBT).

PBT aims to improve rapid balance reactions after unexpected external perturbations. During PBT, participants are repeatedly exposed to destabilizing perturbations while performing activities of daily living in a safe and controlled environment. A systematic review by Mansfield et al. indicated that PBT may be more effective in reducing daily-life falls in older adults, compared to various interventions ranging from no exercise to individualized physical therapy (risk ratio 0.71, 95% CI=0.52,0.96; P=.02),[7]. With PBT, balance adaptation may occur faster, potentially achieving equal or better results with fewer training sessions compared to conventional balance training,[8].

However promising, even effective interventions are likely to fail if they are not acceptable to the target population. The more acceptable the intervention, the more likely that adherence will be high,[9]. In turn, higher adherence (>80%) may result in larger effects,[10]. Due to the nature of the intervention, the question arises whether acceptability is an issue in PBT. In 2019, Okubo et al found in a pilot study of 10 healthy older adults that self-reported anxiety levels before a training session increased significantly with increasing unpredictability of PBT,[11]. Unpredictable perturbations are required in PBT to maximize learning of reactive balance control, yet these perturbations may cause anxiety and consequentially decrease acceptability.

So far limited evidence exists about the acceptability of PBT. Previous studies reported high training adherence rates, and no significant differences in drop-out rates between PBT and control groups receiving exercise or flexibility training,[12-14]. However, while quantitative data such as adherence rates may be indirect indicators of acceptability, the full-fledged concept of acceptability is a subjective evaluation made by individuals who experience an intervention,[9]. In 2017, Sekhon et al., proposed the Theoretical Framework of Acceptability (TFA) in which acceptability is viewed as a multifaceted construct, consisting of seven components.[9].

To our knowledge, no studies thus far have focused on qualitative aspects of acceptability of PBT in older adults. The aim of this study is to explore acceptability of PBT as perceived by older adults with a recent history of falls. Their views on the components constituting acceptability will be explored. The findings will enable optimisation of future implementation of PBT in clinical practice.

## METHODS

### Study design

A qualitative study consisting of semi-structured interviews was conducted. All participants provided written informed consent. This study was approved by the Medical Ethics Committee of MUMC+ (Maastricht University Medical Center) and Maastricht University (METC NL67131.068.18). The study is reported in line with the COREQ statement,[15].

### Context, study participants and sampling

Older adults who participated in PBT as part of a RCT were included,[16]. Community-dwelling older adults (age  $\geq 65$  years) who visited the hospital's outpatient clinic due to a fall incident were informed about the study, and approached by telephone a 3-7 days later. Participants were included in the RCT if they were able to walk for 15 minutes without a walking aid. Exclusion criteria included any risk factors to them participating in PBT (e.g. diagnosed osteoporosis, severe cardiopulmonary disease), or inability to communicate in Dutch. Participants were eligible for the qualitative interviews after they had completed the PBT. They were selected by the PBT trainers through a combination of typical case and purposive sampling, to select those participants who were representative of the study population and were expected to provide the most detailed input.

The PBT protocol consisted of three 30-minute sessions, during which participants were exposed to sudden balance perturbations while they stood and walked on a dual-belt treadmill embedded in a moveable platform (Computer Assisted Rehabilitation Environment (CAREN), Motek Medical BV). During the training, virtual environments were projected on a 180° screen in front of the platform. Each session consisted of three standardized conditions, while progression of difficulty levels in each condition was individualized.

1. Gait adaptability: participants walked on the treadmill while a virtual environment of a forest road, with various slopes and turns, was projected onto the screen. The platform moved correspondingly.
2. Static reactive balance: participants stood on the platform while the platform and treadmill made sudden, variable and unpredictable movements to perturb balance.
3. Dynamic reactive balance: this training condition was similar to the one above, only the perturbations were applied while the participant was walking on the treadmill.

A detailed description of the PBT protocol is published elsewhere,[16]. For an impression of the PBT setting, see Figure 1.

### Insert Figure 1

*Figure 1: Picture of a participant during PBT. Picture published with participant's permission.*

### Theoretical framework

The interviews were based on the TFA as proposed by Sekhon et al.,[9]. In this framework, acceptability is defined as a multi-faceted, seven component construct, including: affective attitude, burden, ethicality, intervention coherence, opportunity costs, perceived effectiveness and self-efficacy. *Table 1* provides an overview of our operationalisation of each construct and an example of a related

question from our interview guide ([supplemental file 1](#)). Questions regarding context-specific barriers and facilitators (e.g. training location, supervision during training) to participate in PBT were added to gain insight in their influence on PBT acceptability.

**Table 1: Theoretical framework of acceptability themes and interpretation.**

| THEME                          | INTERPRETATION                                                                                                                                                                                                             |
|--------------------------------|----------------------------------------------------------------------------------------------------------------------------------------------------------------------------------------------------------------------------|
| <b>AFFECTIVE ATTITUDE</b>      | How an individual feels about the PBT<br><i>How do you feel about the training? What made you feel this way?</i>                                                                                                           |
| <b>SELF-EFFICACY</b>           | The participant's confidence in their ability to perform the PBT<br><i>How did you do in the training?</i>                                                                                                                 |
| <b>PERCEIVED EFFECTIVENESS</b> | The extent to which the participant perceives the PBT to potentially and actually (observed) be effective<br><i>To what extent did you experience effects from the training?</i>                                           |
| <b>ETHICALITY</b>              | The extent to which the intervention had good fit with an individual's value system and expectations of a falls prevention intervention<br><i>To what extent did the training fit with your views on falls prevention?</i> |
| <b>INTERVENTION COHERENCE</b>  | The extent to which the participant understands the aim of PBT and how it works<br><i>In your own words, what was the aim of the training?</i>                                                                             |
| <b>BURDEN</b>                  | The perceived amount of effort that was required to participate in the PBT<br><i>To what extent did you find the training strenuous? To what extent did you find the training challenging?</i>                             |
| <b>OPPORTUNITY COSTS</b>       | The extent to which benefits, profits or values were given up to participate in the PBT<br><i>To what extent did you forego other opportunities to participate in the training?</i>                                        |

PBT; perturbation-based balance training

### Interview procedure

The interviews took place at the hospital, within one to three weeks after training completion, between February 2020 and May 2021. Interviews and analysis were completed before results on the effectiveness of the PBT protocol were analysed. The first 13 interviews (of in total 16) were led by a researcher (MG) who was involved in the PBT program, because she was familiar with the specifics of the training and could ask targeted follow-up questions. A second researcher was always present at the interviews as an observer, to help keep track of the interview guide, and take field notes. A verbal summary was given at the end of each interview and a written summary was sent to each participant for a member check. Interviews were conducted iteratively; the interview guide was adjusted after the first 3 interviews to include emerging themes. This process was repeated after 10 and 13 interviews were completed. All interviews were recorded using a digital voicerecorder and transcribed verbatim. Any names and other possible identification information were removed from the transcripts. As the interviews and transcripts were in Dutch, all quotes presented were translated with care to conserve the original meaning.

### Analysis

Interview transcripts were analysed using a template analysis approach,<sup>[17, 18]</sup>. The a priori template was formed based on the TFA and interview guide. Two researchers (MG and JS) independently coded

the first three interviews, using NVivo 12,[19]. After coding, they discussed the codes until consensus and formed an initial template. This process was repeated for the next three interviews. Consensus was then reached that this third template version covered the transcripts that were analysed so far. MG subsequently coded the remaining interviews using the third template version. MG and JS discussed if any changes needed to be made to the template based on the later interviews. After the 9<sup>th</sup> interview was coded, no more changes to the template were indicated. This was confirmed by coding the remaining 4 interviews, and coding saturation was reached,[20].

### Reflexivity and triangulation

As MG was involved in the PBT for these participants, as well as sampling and interviewing, it was possible that there was researcher bias or that participants were more inclined to give desirable answers. For the purpose of interviewer triangulation, three additional interviews (interviews 14-16) were conducted by an independent researcher (AW) to confirm or reject previous responses. Coding of these three interviews revealed no new codes, which can be interpreted as secondary confirmation of the coding template and saturation. Participants did not give different answers to different interviewers. JS and AW were not involved in the RCT on PBT and represented an outsider perspective in the design and review of the interview guide, coding and analysis, therewith contributing to further researcher triangulation. Through comparison and discussion of the transcripts, the authors then reached consensus on the most important themes from the interviews.

### Patient and public involvement

Patients were first involved in pilot testing of the PBT protocol in this research, and the training protocol was fine-tuned based on their feedback. The aim of this study is to explore participant's perceptions and views on the acceptability of the training, which may be used to guide design or implementation of future PBT interventions.

## RESULTS

### Participant description

Sixteen participants (14 females and 2 males, mean age  $73.6 \pm 6.0$  years) were approached, all of which accepted. For comparison, the RCT included a total of 82 participants, of which 39 were randomized to the PBT group (median age 73 years (IQR 10 years), 31 females and 8 males)66 females and 17 males, and participants' mean age was  $72.9 \pm 5.3$  years. Table 2 provides an overview of participants and characteristics. Nine interviews were conducted at the hospital, seven were telephone interviews due to restrictions related to the COVID-19 pandemic. Interviews lasted 15-35 minutes. One participant (P031) missed one training session due to COVID-19 restrictions. Training adherence was 93,7% for the full PBT group, and 98,3% for participants included in this qualitative study.

**Table 2: Overview of participant and interview characteristics.**

| Participant | Sex (F/M) | Age (years) | Falls previous year (n) | Interview type | Interviewer |
|-------------|-----------|-------------|-------------------------|----------------|-------------|
| P022        | F         | 79          | 1                       | Face-to-face   | MG          |
| P023        | F         | 80          | 1                       | Face-to-face   | MG          |
| P026        | M         | 65          | 1                       | Telephone      | MG          |
| P027        | F         | 76          | 2                       | Face-to-face   | MG          |
| P030        | F         | 83          | 1                       | Telephone      | MG          |
| P031        | M         | 67          | 1                       | Telephone      | MG          |
| P032        | F         | 79          | 1                       | Telephone      | MG          |
| P040        | F         | 73          | 2                       | Face-to-face   | MG          |

|      |   |    |   |              |    |
|------|---|----|---|--------------|----|
| P042 | F | 65 | 2 | Face-to-face | MG |
| P043 | F | 74 | 1 | Face-to-face | MG |
| P044 | F | 79 | 4 | Face-to-face | MG |
| P045 | F | 74 | 1 | Face-to-face | MG |
| P050 | F | 79 | 1 | Face-to-face | MG |
| P068 | F | 70 | 1 | Telephone    | AW |
| P069 | F | 66 | 3 | Telephone    | AW |
| P082 | F | 69 | 1 | Telephone    | AW |

*F = female, M = male.*

### Perceptions of acceptability

The findings are presented below for each of the TFA components, along with illustrative quotes from participants. The theme 'training setting' was added, this theme includes context-specific barriers and facilitators that were described by the participants.

#### Affective attitude

Overall, participants described that they felt the PBT was an enjoyable experience. Most participants positively related this to the novelty of the experience, reporting feelings of curiosity and excitement. In contrast, some participants related this novelty to a feeling of suspense, and sometimes feeling unsure about their ability to participate in PBT at the start of the first training session. Most often this was described as a good amount of suspense and curiosity about what would happen, and not perceived as a barrier.

P044 *"I didn't know what I could expect. But I said: Guys, I'll just see what happens, I'll leave it up to you. (...) In the beginning, you don't know what is going to happen to you. You feel a little insecure. But I was glad that I did it."*

One participant described feeling anxious during the first training session, a feeling that fortunately decreased throughout the following sessions.

P030 *"Now you know what you have to do so it's different. But at first it's kind of a startle response I think."*

All participants reported that feeling safe and able to challenge themselves without fear of falling was closely related to a positive experience. The safety equipment (especially the safety harness), feeling heard by the trainer and receiving information during the training session were identified as important facilitators.

P050 *"And again, (laughing) I was very happy that I didn't need to hang from those ropes [safety harness], but I had complete faith that if anything were to happen I definitely would not fall. So that didn't cause any anxiety for me."*

#### Self-efficacy

All participants described that they were able to participate in the training sessions, and that they felt they did well. Some participants reported that their sense of self-efficacy grew throughout the training sessions, starting with feeling unsure about their ability at the first training session, to feeling accomplished after the second or third session. Some of these participants related their initial apprehension to comorbidities.

P031 *"I have COPD and you're aware that there are situations in which you may have to drop out. And in that sense, this could have happened to me in this training as well. Fortunately, it didn't."*

Finally, one participant provided an example of how she felt after the training sessions.



1  
2  
3 P022 *“Well, I can say that I feel I did well. It brings you joy if you have something like that (decreased*  
4 *strength in one leg due to a comorbidity) and you’re still able to catch yourself well.”*

### 6 **Perceived effectiveness**

7 This construct is understood as the extent to which participants perceived changes in their physical  
8 or psychological functioning, and attributed this to the training. Perceived training effects can be  
9 divided into physical and psychological effects. For most participants, recognizing physical training  
10 effects was not straightforward. Some participants clearly described improvements in their daily  
11 activities which they attributed to the training, such as improved walking ability or balance.

12  
13  
14 P068. *“I’ve been walking my son’s dog a lot lately. (...) I’ve noticed that because of that (training) I’m*  
15 *steadier on my legs. Like this morning when I walked him, I had to walk downhill. And before I did the*  
16 *balance training, I would have thought ‘Oh I have to be careful’, but now I just know: I have to move*  
17 *like this, I have to put my foot here. And I can do this.”*

18  
19 Still, most participants expressed that their physical abilities had remained the same, and wondered  
20 how they could have noticed possible changes due to training. For most, falling or stumbling was not  
21 a daily occurrence to begin with, and as the interviews took place shortly after training completion,  
22 they noted that potential changes were not easily identifiable in this short term. This was neither  
23 described as a barrier nor a facilitator to participating in the PBT.

24  
25  
26 P031. *“But if my balance has improved because of it, that’s very hard to determine, because I don’t fall*  
27 *very often. That I broke my wrist due to a fall was more of an accident.”*

28  
29 Psychological effects were described as much more apparent and positively related to the acceptability  
30 of the intervention. Most participants expressed that the training had helped them gain confidence  
31 and improved self-efficacy, during the training sessions and in everyday life. They attributed this to  
32 how during the training they experienced that their body was capable of more than they expected.

33  
34 P068. *“Especially the first time I noticed that I was quite insecure. (...) And that was more related to my*  
35 *confidence, which had been damaged. And I noticed after a few times that I, because of the training*  
36 *actually, gained some confidence. That I got more confident in my body.”*

### 38 **Ethicality**

39 This construct may not only be related to the extent to which the PBT was perceived to be a good fit  
40 with the participant’s value system, but also to their expectations of the PBT. Most participants  
41 reported that anything they could do to prevent future fall incidents was viewed as valuable.

42  
43  
44 P069 *“Well, I was really glad about it, because I thought ‘anything I can practice or do to help me fall*  
45 *less, will be helpful’ ”*

46  
47 Some participants found it hard to describe if falls prevention in general fit within their value system.  
48 Often participants related this to not having heard or thought about falls prevention until they were  
49 approached by the study team.

50  
51 P032 *“I hadn’t heard or read anything about it before, I started this without expectations.”*

52  
53 Some also described having thought about it but not knowing who to approach about the topic, or not  
54 considering that they needed it. The lack of prior knowledge or expectations about the PBT was not  
55 perceived as a barrier to participating. Conclusively, some participants valued being able to contribute  
56 to a scientific study.

### Intervention Coherence

All participants were able to recognize and describe the aim of the intervention to a certain degree. For example:

P023 *"In my own words? That you're more able to keep your balance. And it has worked."*

Another participant provided a more detailed explanation of what she perceived as the aim of the intervention.

P043 *"To be able to recover, when you've lost balance. I think that that was the aim. That you're able to react; your body, your legs, or even with the help of an arm swing. Faster recovery to regain your balance."*

A factor that repeatedly emerged related to coherence of the intervention, is 'intervention validity'; understood as the extent to which participants perceived that the intervention had a good fit with its' aims. Most participants who discussed this topic, described the intervention as valid and perceived this as a facilitator to participating in PBT.

P026 *"A few times I nearly fell, but then you're able to correct this and it's a beautiful simulation of what can happen in real life. Especially when the treadmill belts don't run at the same speed, when one decelerates while the other continues. Then you get an effect like you're experiencing a slip."*

However, a few participants also questioned if it was at all possible to prevent a future fall incident, reasoning that a fall occurs too sudden to make any preventive adjustments.

### Burden

Participants agreed that the burden of participating in PBT was acceptable. The training was perceived as challenging, but not too challenging. Some participants positively related this to the way the training sessions were structured, providing a gradual and personalized increase in challenge.

P069 *"No, there was a good and gradual increase in challenge. They started the training quite easy and then it gradually became harder. It was very well structured."*

Most effort was required to maintain or regain balance, and to stay focused throughout the session. Participants reported that the required physical stamina was not an important contributing factor to the perceived training load. When mentioned, participants described that the unexpected balance perturbations were perceived as more challenging than the first part of the training, where they could anticipate on what would happen next.

P022 *"The hard part was when it was sudden, unexpected. Going left, right, forward. That was, well, not hard; you can get it done, but you have to make sure you don't fall, even if you're in a safety harness."*

### Opportunity costs

Participants agreed that no activities had to be given up to participate in the PBT. Most related this to having enough time after retirement. The possibility to schedule the training sessions in consultation with the trainer instead of having fixed training times was reported as an important facilitator. Most participants accepted travelling to the training location as a fact and did not describe this as either a barrier or a facilitator. A few participants found the central location of the hospital a positive factor, as this was easy to reach using public transportation. Another few participants described that any location outside walking distance provided a challenge and a potential barrier, as they were no longer able to drive a car and had to rely on public transportation or family members to get there. As for the training location being inside a university hospital, this was mostly perceived as an advantage. Participants often described that they thought this was the logical place where they expected to find

1  
2  
3 the right equipment and expertise for this kind of training. Some also mentioned that they regarded  
4 the university hospital as a familiar institute, and therefore easy to find.  
5

### 6 **Training setting**

7 This additional theme was identified throughout the interviews, and includes specific factors related  
8 to the setting of the PBT. The PBT took place in a specific setting with specialized technological  
9 equipment (see *Figure 1*) inside a university hospital. Most participants described that they  
10 experienced the technological training equipment as positive, as a surprising and interesting novelty.  
11 One participant explained that she felt slightly overwhelmed when she first saw the training  
12 equipment, but this improved when she got a more detailed explanation of what was going to  
13 happen and when she experienced the training for herself.  
14  
15

16 P031. *“The setting was very surprising. The fact that you’re walking on a treadmill in an environment  
17 that moves with you. I thought it was a very extraordinary experience.”*  
18

19 Most participants described the virtual environments that were used during training as surprising and  
20 positive. A few participants expressed a preference for the first virtual environment (the forest road),  
21 describing that this felt more friendly and stimulating than the second, more industrial environment.  
22

23 The individual nature of this training was clearly valued by some participants, while others were  
24 ambivalent about this. Participants who indicated a preference for training individually, described that  
25 they enjoyed being able to really focus on the training itself without distractions from other people or  
26 the environment, and to train at their own level. Some also reasoned that this increased the potential  
27 of the training to be effective.  
28

29 P068. *“This, the balance training, is not something you can do in a group. And I just thought it was very  
30 pleasant, because you’re focusing on yourself. You’re focused on what is going to happen, and you can  
31 feel everything that happens (...). And I just think that it is much more pleasant this way, and it will be  
32 more helpful.”*  
33  
34

35 While most participants preferred training individually, some described that they were curious to see  
36 how other people performed during the training sessions. Additionally, two participants would have  
37 appreciated the opportunity to compare and discuss fall-related experiences with peers.  
38

39 A numeric rating scale (NRS) was used as a tool to individualize training progression. During the training  
40 sessions, participants were regularly asked to score how challenged they felt at that moment, ranging  
41 from 0 (not challenged at all) to 10 (highest perceivable challenge). Participants described mixed  
42 experiences with this system. Some found the scoring easy and even helpful and described that it  
43 helped them gain insight in how they felt at that moment. Others described that they had trouble  
44 translating their subjective experience to a number that meant little to them. Overall, the NRS scoring  
45 was not perceived as an important barrier or facilitator.  
46  
47

### 48 **DISCUSSION**

49 The aim of this study was to evaluate the acceptability of a PBT program as perceived by older adults,  
50 using the TFA. Gaining understanding of the acceptability of PBT in older adults with a recent history  
51 of falls is imperative to enable and optimize future implementation of PBT in clinical practice.  
52

53 The results indicate that this PBT protocol is perceived as acceptable by older adults with a recent  
54 history of falls and highlight key areas for potential future modifications. Besides the TFA, one  
55 additional theme emerged from the data, which includes challenges specific to the training setting  
56 such as preference for group training in some participants and travel to the training location.  
57  
58  
59  
60

1  
2  
3 Participants valued being able to feel safe during training. Most reported that this was accomplished  
4 by using the safety harness, the physical presence and guidance from the trainer, and individualized  
5 training progression. These results reflect those of Miller et al., who evaluated the perceived  
6 acceptability of conceptually challenging exercise training to older adults, including dynamic balance  
7 tasks with external perturbations,[21]. The novelty of the training and technology were regarded as a  
8 positive factor contributing to enjoyment by most participants. However, as in Miller's study, some  
9 participants reported feeling initially apprehensive or anxious towards the new training. Okubo et  
10 al.,[11], related elevated anxiety levels during PBT to the unpredictability of the perturbations. We  
11 previously hypothesized that a more gradual training progression over multiple sessions may help  
12 participants build confidence and alleviate anxiety while still being effective,[22]. This hypothesis is  
13 partially confirmed by our current findings, which indicated that self-efficacy improved over time.  
14 Participants who initially experienced anxiety also reported that this improved over time, and  
15 individualized training progression was reported as a facilitator to feeling safe during training. As  
16 unexpected perturbations are key for task-specific PBT, the trade-offbalance between measures to  
17 alleviate anxiety while still achieving the desired training stimulus should be considered in future  
18 implementation. Our findings suggest that this may be particularly important at the start of training.  
19

20  
21  
22 Perceived psychological effects in the form of increased confidence in balance abilities, and increased  
23 self-efficacy in daily life were often reported. Consistent with previous studies on falls prevention  
24 interventions, participants described that the PBT helped them gain insight in their ability level and  
25 were pleasantly surprised by their ability,[21, 23]. This is important as maintaining balance confidence  
26 can help avoid undue activity avoidance and subsequent disability,[24]. Moreover, decreased balance  
27 confidence has been identified as a predictor for future falls,[25]. While participants generally felt they  
28 did well during training, perceived physical effects in daily life were less apparent. Participants  
29 questioned how they would notice physical training effects, as falling was not a daily occurrence for  
30 them to begin with. In part, this may have been related to the interviews taking place shortly after  
31 training completion, leaving little time for participants to experience training effects. However, we  
32 hypothesize that this may also be related to the perceived intervention validity and ethicality.  
33  
34  
35

36 While the topic of perceived intervention validity emerged in most of the interviews, participants views  
37 were mixed. Some described that they perceived the intervention valid as it clearly simulated daily-life  
38 balance perturbations. In contrast, other participants did not discuss PBT specifically, rather  
39 questioned if it was at all possible to prevent a fall in daily life, describing that falls occurred too sudden  
40 to intervene or were 'just accidents that could happen to anybody'. The belief that falls are just bad  
41 luck, and disbelief that they are preventable is well-known from the literature,[26-298]. A review by  
42 McInnes et al. recommended that these beliefs should be countered prior to intervention,[3029].  
43 While all participants in our study had recently fallen and agreed to participate in the current  
44 intervention, none of them actively sought to participate in falls prevention before. Participants  
45 described that they had previously given little or no thought to falls prevention, or that they did not  
46 think they needed it. This is in line with previous studies, indicating that those who have previously  
47 fallen are not necessarily more likely to be receptive to falls prevention interventions,[310, 324].  
48 Another study described that older adults may reject the idea that they need falls prevention because  
49 they regard themselves as healthy and able to manage,[332]. PBT being a relatively new intervention,  
50 it may be assumed that this intervention is even less known to potential participants, thus increasing  
51 the challenge to reach the target population. Some participants reported that being informed by or  
52 talking to a health practitioner about the PBT, and being approached by the researchers, prompted  
53 them to consider falls prevention or to finally participate. This corroborates findings from Yardley et  
54 al., reporting that a personal invitation by a health practitioner may be a facilitating factor to  
55 participation in falls prevention,[343]. Our findings suggest that these factors may be particularly  
56 important to consider for PBT or any relatively unknown intervention, to effectively reach older adults.  
57  
58  
59  
60

1  
2  
3 Some participants clearly expressed a preference for training individually. Others described that they  
4 would have been curious to see how others performed during the training sessions, or to share fall-  
5 related experiences with others. Promoting the social value of falls prevention interventions has been  
6 previously identified as a facilitator,[3029]. Additionally, watching or partnering with a peer completing  
7 the same exercises may facilitate participation and improve older adults' confidence for their own  
8 attempt,[21, 354, 365]. As PBT is currently not suited for a group intervention, it may be considered to  
9 provide a medium between individual and group training, while simultaneously addressing the initial  
10 apprehension or anxiety experienced by some participants. Specifically, this could be achieved by  
11 providing new participants with a video of a peer completing the exercises before their own  
12 participation, or combining training sessions of two participants where they can see each other  
13 perform and share experiences. Conclusively, hearing experiences from peers who completed the PBT  
14 might also improve perceived intervention validity and ethicality for future participants.  
15  
16

17  
18 Finally, a practical factor that should be considered is travelling to the training location. As is the case  
19 with most set-ups for PBT, the equipment used in this program is not yet available in many locations.  
20 Some participants described that while they were able to attend the PBT sessions, travel was a  
21 potential barrier. This barrier is well-known in this population, as some older adults are no longer able  
22 to drive a car themselves and thus depend on family members or public transportation,[343, 376].  
23

### 24 **Strengths and Limitations**

25  
26 To our knowledge, this is the first study to use the TFA to examine older adults' perceived acceptability  
27 of PBT. Using the TFA enabled a systematic approach to define and assess intervention  
28 acceptability,[9]. While triangulation was applied in data collection as well as data analysis to increase  
29 trustworthiness of the research findings, it should be noted that one researcher (MG) was involved in  
30 the PBT sessions, as well as most of the interviews. In future studies, it may be considered to include  
31 a dedicated interviewer separate to the intervention team. A few limitations should be considered  
32 when interpreting the results of our study. First, the PBT intervention was applied in a research setting,  
33 meaning that some specific factors, such as willingness to pay for participation in the intervention,  
34 were not evaluated. Second, the results only reflect the perceived retrospective acceptability of the  
35 PBT. Further research is necessary to evaluate prospective and concurrent acceptability, to further  
36 elucidate what factors motivate or prevent older adults from participating in PBT,[9].  
37  
38

39  
40 A final consideration is that due to COVID-19 related restrictions, 7 out of the 16 interviews in this  
41 study were telephone interviews. While face-to-face interviews are often regarded as the gold  
42 standard, there is little evidence that quality of findings collected through telephone interviews is  
43 compromised,[387]. Consistent with Sturges et al., we identified no clear differences between data  
44 collected through face-to-face interviews compared to telephone interviews in our study,[398].  
45

### 46 **CONCLUSIONS**

47  
48 In conclusion, findings from this study indicate that a technology-assisted PBT program is acceptable  
49 to older adults with a recent falls history. Enjoyment of the intervention, being able to feel safe,  
50 perceived psychological effectiveness and individualized training progression were identified as  
51 important factors contributing to the perceived acceptability. Increasing the social aspect of training  
52 and sharing experiences of peers may be considered to enhance acceptability to new participants who  
53 initially feel apprehensive or anxious about their ability to participate, or who are unsure what to  
54 expect. Raising awareness of the importance and possibilities of falls prevention training in general is  
55 a challenge in this population.  
56  
57

### 58 **Acknowledgements**

59  
60 We thank Anouk Weemaes for her contribution in conducting the interviews in this study.

### Ethics statement

All participants provided written informed consent. This study was approved by the Medical Ethics Committee of MUMC+ (Maastricht University Medical Center) and Maastricht University (METC NL67131.068.18).

### Competing interest

The authors declare no competing interests.

### Funding

This research received no specific grant from any funding agency in the public, commercial or not-for-profit sectors.

### Contributorship statement

Marissa Gerards: Conceptualization, Methodology, Validation, Formal Analysis, Investigation, Data Curation, Writing – Original Draft, Visualization, Project Administration. Judith Sieben: Methodology, Validation, Formal Analysis, Data Curation, Writing – Review & Editing. Rik Marcellis: Conceptualization, Writing – Review & Editing. Rob de Bie: Conceptualization, Writing – Review & Editing, Supervision. Kenneth Meijer: Conceptualization, Writing – Review & Editing, Supervision. Antoine Lenssen: Conceptualization, Writing – Review & Editing, Supervision, Project Administration.

### Data availability

No additional data available.

### REFERENCES

- 1 Sherrington C, Fairhall NJ, Wallbank GK, et al. Exercise for preventing falls in older people living in the community. *Cochrane Database Syst Rev* 2019;1. doi: 10.1002/14651858.CD012424.pub2
- 2 Rieger MM, Papegaaij S, Steenbrink F, et al. Perturbation-based gait training to improve daily life gait stability in older adults at risk of falling: protocol for the REACT randomized controlled trial. *BMC Geriatr* 2020;20(1):167. doi: 10.1186/s12877-020-01566-z
- 3 Bunn F, Dickinson A, Barnett-Page E, et al. A systematic review of older people's perceptions of facilitators and barriers to participation in falls-prevention interventions. *Ageing Soc* 2008;28(4):449-72. doi:10.1017/S0144686X07006861
- 4 Berg WP, Alessio HM, Mills EM, et al. Circumstances and consequences of falls in independent community-dwelling older adults. *Age Ageing* 1997;26(4):261-8. doi: 10.1093/ageing/26.4.261
- 5 Talbot LA MR, Witham EK, Metter EJ. Falls in young, middle-aged and older community dwelling adults: perceived cause, environmental factors and injury. *BMC Public Health* 2005;5. doi: 10.1186/1471-2458-5-86
- 6 Maki BE, McIlroy WE. Change-in-support balance reactions in older persons: an emerging research area of clinical importance. *Neurol Clin* 2005;23(3):751-83. doi: 10.1016/j.ncl.2005.01.002
- 7 Mansfield A, Wong JS, Bryce J, et al. Does perturbation-based balance training prevent falls? Systematic review and meta-analysis of preliminary randomized controlled trials. *Phys Ther* 2015;95(5):700-9. doi: 10.2522/ptj.20140090

- 1  
2  
3 8 Pai YC, Bhatt T, Yang F, et al. Perturbation training can reduce community-dwelling older adults'  
4 annual fall risk: a randomized controlled trial. *J Gerontol A Biol Sci Med Sci* 2014;69(12):1586-94. doi:  
5 10.1093/gerona/glu087  
6
- 7 9 Sekhon M, Cartwright M, Francis JJ. Acceptability of healthcare interventions: an overview of reviews  
8 and development of a theoretical framework. *BMC Health Serv Res* 2017;17(1):88. doi:  
9 10.1186/s12913-017-2031-8  
10
- 11 10 Osho O, Owoeye O, Armijo-Olivo S. Adherence and Attrition in Fall Prevention Exercise Programs  
12 for Community-Dwelling Older Adults: A Systematic Review and Meta-Analysis. *J Aging Phys Act*  
13 2018;26(2):304-26. doi: 10.1123/japa.2016-0326  
14
- 15 11 Okubo Y, Brodie MA, Sturnieks DL, et al. A pilot study of reactive balance training using trips and  
16 slips with increasing unpredictability in young and older adults: Biomechanical mechanisms, falls and  
17 clinical feasibility. *Clin Biomech (Bristol, Avon)* 2019;67:171-9. doi: 10.1016/j.clinbiomech.2019.05.016  
18  
19
- 20 12 Kurz I, Gimmon Y, Shapiro A, et al. Unexpected perturbations training improves balance control and  
21 voluntary stepping times in older adults - a double blind randomized control trial. *BMC geriatr*  
22 2016;16:58. doi: 10.1186/s12877-016-0223-4  
23
- 24 13 Lurie JD, Zagaria AB, Pidgeon DM, et al. Pilot comparative effectiveness study of surface  
25 perturbation treadmill training to prevent falls in older adults. *BMC Geriatr* 2013;13:49. doi:  
26 10.1186/1471-2318-13-49  
27
- 28 14 Mansfield A, Peters AL, Liu BA, et al. Effect of a perturbation-based balance training program on  
29 compensatory stepping and grasping reactions in older adults: a randomized controlled trial. *Phys Ther*  
30 2010;90(4):476-91. doi: 10.2522/ptj.20090070  
31
- 32 15 Tong A, Sainsbury P, Craig J. Consolidated criteria for reporting qualitative research (COREQ): a 32-  
33 item checklist for interviews and focus groups. *Int J Qual Health Care* 2007;19(6):349-57. doi:  
34 10.1093/intqhc/mzm042  
35
- 36 16 Gerards MHG, Marcellis RGJ, Poeze M, et al. Perturbation-based balance training to improve  
37 balance control and reduce falls in older adults – study protocol for a randomized controlled trial. *BMC*  
38 *Geriatr* 2021;21(1):9. doi: 10.1186/s12877-020-01944-7  
39
- 40 17 Brooks J, McCluskey S, Turley E, et al. The Utility of Template Analysis in Qualitative Psychology  
41 Research. *Qual Res Psychol* 2015;12(2):202-22. doi: 10.1080/14780887.2014.955224  
42
- 43 18 King N. Template analysis. *Qualitative methods and analysis in organizational research: A practical*  
44 *guide*. Thousand Oaks, CA: Sage Publications Ltd 1998:118-34.  
45
- 46 19 QSR International Pty Ltd. NVivo qualitative data analysis software, version 12 2018.  
47
- 48 20 Saunders B, Sim J, Kingstone T, et al. Saturation in qualitative research: exploring its  
49 conceptualization and operationalization. *Qual Quant* 2018;52(4):1893-907. doi: 10.1007/s11135-017-  
50 0574-8  
51
- 52 21 Miller CT, Teychenne M, Maple J-L. The perceived feasibility and acceptability of a conceptually  
53 challenging exercise training program in older adults. *Clin Interv Aging* 2018;13:451-61. doi:  
54 10.2147/CIA.S154664  
55
- 56 22 Gerards MHG, McCrum C, Mansfield A, et al. Perturbation-based balance training for falls reduction  
57 among older adults: Current evidence and implications for clinical practice. *Geriatr Gerontol Int*  
58 2017;17(12):2294-303. doi: 10.1111/ggi.13082  
59  
60

- 1  
2  
3 23 Davis JC, Dian L, Parmar N, et al. Geriatrician-led evidence-based Falls Prevention Clinic: a  
4 prospective 12-month feasibility and acceptability cohort study among older adults. *BMJ Open*  
5 2018;8(12):e020576. doi: 10.1136/bmjopen-2017-020576  
6  
7 24 Büla CJ, Monod S, Hoskovec C, et al. Interventions aiming at balance confidence improvement in  
8 older adults: an updated review. *Gerontology* 2011;57(3):276-86. doi: 10.1159/000322241  
9  
10 25 Landers MR, Oscar S, Sasaoka J, et al. Balance Confidence and Fear of Falling Avoidance Behavior  
11 Are Most Predictive of Falling in Older Adults: Prospective Analysis. *Phys Ther* 2016;96(4):433-42. doi:  
12 10.2522/ptj.20150184  
13  
14 26 Commonwealth of Australia. Preventing Falls and Harm From Falls in Older People: Best Practice  
15 Guidelines for Australian Community Care 2009.  
16 <https://www.safetyandquality.gov.au/sites/default/files/migrated/Guidelines-COMM.pdf> Accessed  
17 19/08/2021  
18  
19  
20 27 Claire Ballinger SP. Falling from grace or into expert hands? Alternative accounts about falling in  
21 older people. *Br J Occup Ther* 2000;63(12):573-9. doi: 10.1177/030802260006301203  
22  
23 28 Kong KS, Lee Fk FK, Mackenzie AE, et al. Psychosocial consequences of falling: the perspective of  
24 older Hong Kong Chinese who had experienced recent falls. *J Adv Nurs* 2002;37(3):234-42. doi:  
25 10.1046/j.1365-2648.2002.02094.x  
26  
27 29 Finnegan S, Bruce J, Seers K. Life after falls prevention exercise – experiences of older people taking  
28 part in a clinical trial: a phenomenological study. *BMC Geriatr* 2021;21(1):91. doi: 10.1186/s12877-021-  
29 02037-9  
30  
31 3029 McInnes E, Askie L. Evidence Review on Older People's Views and Experiences of Falls Prevention  
32 Strategies. *Worldviews Evid Based Nurs* 2004;1(1):20-37. doi: 10.1111/j.1741-6787.2004.04013.x  
33  
34 310 Cumming RG, Thomas M, Szonyi G, et al. Adherence to occupational therapist recommendations  
35 for home modifications for falls prevention. *Am J Occup Ther* 2001;55(6):641-8. doi:  
36 10.5014/ajot.55.6.641  
37  
38 321 Edwards N, Lockett D, Aminzadeh F, et al. Predictors of Bath Grab-Bar Use among Community-  
39 Living Older Adults. *Can J Aging* 2003;22(2):217-27. doi:10.1017/S0714980800004530  
40  
41 332 Allen A, Simpson JM. A primary care based fall prevention programme. *Physiother Theory Pract*  
42 1999;15(2):121-33. doi: 10.1080/095939899307810  
43  
44 343 Yardley L, Donovan-Hall M, Francis K, et al. Attitudes and Beliefs That Predict Older People's  
45 Intention to Undertake Strength and Balance Training. *The Journals of Gerontology. Series B*  
46 2007;62(2):119-P25. doi: 10.1093/geronb/62.2.p119  
47  
48 354 Bethancourt HJ, Rosenberg DE, Beatty T, et al. Barriers to and facilitators of physical activity  
49 program use among older adults. *Clin Med Res* 2014;12(1-2):10-20. doi: 10.3121/cmr.2013.1171  
50  
51 365 Biedenweg K, Meischke H, Bohl A, et al. Understanding older adults' motivators and barriers to  
52 participating in organized programs supporting exercise behaviors. *J Prim Prev* 2014;35(1):1-11. doi:  
53 10.1007/s10935-013-0331-2  
54  
55 376 Kiami SR, Sky R, Goodgold S. Facilitators and barriers to enrolling in falls prevention programming  
56 among community dwelling older adults. *Arch Gerontol Geriatr* 2019;82:106-13. doi:  
57 10.1016/j.archger.2019.01.006  
58  
59  
60



1  
2  
3  
4  
5  
6  
7  
8  
9  
10  
11  
12  
13  
14  
15  
16  
17  
18  
19  
20  
21  
22  
23  
24  
25  
26  
27  
28  
29  
30  
31  
32  
33  
34  
35  
36  
37  
38  
39  
40  
41  
42  
43  
44  
45  
46  
47  
48  
49  
50  
51  
52  
53  
54  
55  
56  
57  
58  
59  
60

387 Novick G. Is there a bias against telephone interviews in qualitative research? *Res Nurs Health* 2008;31(4):391-8. doi: 10.1002/nur.20259

398 Sturges JE, Hanrahan KJ. Comparing Telephone and Face-to-Face Qualitative Interviewing: a Research Note. *Qual Res* 2004;4(1):107-18. doi: 10.1177/1468794104041110

For peer review only

## COREQ (CONsolidated criteria for REporting Qualitative research) Checklist

A checklist of items that should be included in reports of qualitative research. You must report the page number in your manuscript where you consider each of the items listed in this checklist. If you have not included this information, either revise your manuscript accordingly before submitting or note N/A.

| Topic                                          | Item No. | Guide Questions/Description                                                                                                                              | Reported on Page No. |
|------------------------------------------------|----------|----------------------------------------------------------------------------------------------------------------------------------------------------------|----------------------|
| <b>Domain 1: Research team and reflexivity</b> |          |                                                                                                                                                          |                      |
| <i>Personal characteristics</i>                |          |                                                                                                                                                          |                      |
| Interviewer/facilitator                        | 1        | Which author/s conducted the interview or focus group?                                                                                                   |                      |
| Credentials                                    | 2        | What were the researcher's credentials? E.g. PhD, MD                                                                                                     |                      |
| Occupation                                     | 3        | What was their occupation at the time of the study?                                                                                                      |                      |
| Gender                                         | 4        | Was the researcher male or female?                                                                                                                       |                      |
| Experience and training                        | 5        | What experience or training did the researcher have?                                                                                                     |                      |
| <i>Relationship with participants</i>          |          |                                                                                                                                                          |                      |
| Relationship established                       | 6        | Was a relationship established prior to study commencement?                                                                                              |                      |
| Participant knowledge of the interviewer       | 7        | What did the participants know about the researcher? e.g. personal goals, reasons for doing the research                                                 |                      |
| Interviewer characteristics                    | 8        | What characteristics were reported about the interviewer/facilitator? e.g. Bias, assumptions, reasons and interests in the research topic                |                      |
| <b>Domain 2: Study design</b>                  |          |                                                                                                                                                          |                      |
| <i>Theoretical framework</i>                   |          |                                                                                                                                                          |                      |
| Methodological orientation and Theory          | 9        | What methodological orientation was stated to underpin the study? e.g. grounded theory, discourse analysis, ethnography, phenomenology, content analysis |                      |
| <i>Participant selection</i>                   |          |                                                                                                                                                          |                      |
| Sampling                                       | 10       | How were participants selected? e.g. purposive, convenience, consecutive, snowball                                                                       |                      |
| Method of approach                             | 11       | How were participants approached? e.g. face-to-face, telephone, mail, email                                                                              |                      |
| Sample size                                    | 12       | How many participants were in the study?                                                                                                                 |                      |
| Non-participation                              | 13       | How many people refused to participate or dropped out? Reasons?                                                                                          |                      |
| <i>Setting</i>                                 |          |                                                                                                                                                          |                      |
| Setting of data collection                     | 14       | Where was the data collected? e.g. home, clinic, workplace                                                                                               |                      |
| Presence of non-participants                   | 15       | Was anyone else present besides the participants and researchers?                                                                                        |                      |
| Description of sample                          | 16       | What are the important characteristics of the sample? e.g. demographic data, date                                                                        |                      |
| <i>Data collection</i>                         |          |                                                                                                                                                          |                      |
| Interview guide                                | 17       | Were questions, prompts, guides provided by the authors? Was it pilot tested?                                                                            |                      |
| Repeat interviews                              | 18       | Were repeat interviews carried out? If yes, how many?                                                                                                    |                      |
| Audio/visual recording                         | 19       | Did the research use audio or visual recording to collect the data?                                                                                      |                      |
| Field notes                                    | 20       | Were field notes made during and/or after the interview or focus group?                                                                                  |                      |
| Duration                                       | 21       | What was the duration of the interviews or focus group?                                                                                                  |                      |
| Data saturation                                | 22       | Was data saturation discussed?                                                                                                                           |                      |
| Transcripts returned                           | 23       | Were transcripts returned to participants for comment and/or                                                                                             |                      |

| Topic                                  | Item No. | Guide Questions/Description                                                                                                        | Reported on Page No. |
|----------------------------------------|----------|------------------------------------------------------------------------------------------------------------------------------------|----------------------|
|                                        |          | correction?                                                                                                                        |                      |
| <b>Domain 3: analysis and findings</b> |          |                                                                                                                                    |                      |
| <i>Data analysis</i>                   |          |                                                                                                                                    |                      |
| Number of data coders                  | 24       | How many data coders coded the data?                                                                                               |                      |
| Description of the coding tree         | 25       | Did authors provide a description of the coding tree?                                                                              |                      |
| Derivation of themes                   | 26       | Were themes identified in advance or derived from the data?                                                                        |                      |
| Software                               | 27       | What software, if applicable, was used to manage the data?                                                                         |                      |
| Participant checking                   | 28       | Did participants provide feedback on the findings?                                                                                 |                      |
| <i>Reporting</i>                       |          |                                                                                                                                    |                      |
| Quotations presented                   | 29       | Were participant quotations presented to illustrate the themes/findings?<br>Was each quotation identified? e.g. participant number |                      |
| Data and findings consistent           | 30       | Was there consistency between the data presented and the findings?                                                                 |                      |
| Clarity of major themes                | 31       | Were major themes clearly presented in the findings?                                                                               |                      |
| Clarity of minor themes                | 32       | Is there a description of diverse cases or discussion of minor themes?                                                             |                      |

Developed from: Tong A, Sainsbury P, Craig J. Consolidated criteria for reporting qualitative research (COREQ): a 32-item checklist for interviews and focus groups. *International Journal for Quality in Health Care*. 2007. Volume 19, Number 6: pp. 349 – 357

**Once you have completed this checklist, please save a copy and upload it as part of your submission. DO NOT include this checklist as part of the main manuscript document. It must be uploaded as a separate file.**
