# Supplementary material for: Acceptability of a perturbation-based balance training programme for falls prevention in older adults: a qualitative study
Source: PubMed Central journal article supplement — BMJ Open. 2022 Feb 24;12(2):e056623. doi: 10.1136/bmjopen-2021-056623 (PMC8883254; doi:10.1136/bmjopen-2021-056623), 2022-02-24
Supplement: bmjopen-2021-056623supp001.pdf [file bmjopen-2021-056623supp001.pdf]

## **Interview guide Acceptability of Perturbation-based balance training (PBT)**

This interview guide gives an overview of the opening questions for each topic. The interviewers used a range of follow-up questions to obtain more information which were adapted and used as appropriate in each interview.

### **Theoretical framework**

Opening question: Can you tell me how you experienced the training?

#### **Affective attitude**

How do you feel about the training?

#### **Burden**

To what extent did you find the training difficult?

To what extent did you find it challenging?

#### **Self-efficacy**

How do you feel you did during the training?

#### **Perceived effectiveness**

To what extent did you notice effects from the training (during training and in daily-life)?

#### **Ethicality**

To what extent did the training fit with your values? To what extent did it fit with your views on falls prevention?

#### **Intervention coherence**

Can you explain to me what the goal of the training was?

#### **Opportunity costs**

To what extent did you have to give up other activities or values to participate in the training?

### **Context-specific factors**

What are your thoughts about...

- ... the location of the training?
- ... training individually, as opposed to in a group?
- ... the technological equipment used in the training?
- ... the scoring system that was used during training?
- ... the way the training was supervised?
